1 **ARTICLE**

2 **Genetic and structural basis for recognition of SARS-CoV-2 spike protein by**  
3 **a two-antibody cocktail**

4  
5 **AUTHORS:** Jinhui Dong<sup>1</sup>, Seth J. Zost<sup>1</sup>, Allison J. Greaney<sup>2,3</sup>, Tyler N. Starr<sup>2</sup>, Adam S. Dings<sup>2</sup>,  
6 Elaine C. Chen<sup>4</sup>, Rita E. Chen<sup>5,6</sup>, James Brett Case<sup>6</sup>, Rachel E. Sutton<sup>1</sup>, Pavlo Gilchuk<sup>1</sup>, Jessica  
7 Rodriguez<sup>1</sup>, Erica Armstrong<sup>1</sup>, Christopher Gainza<sup>1</sup>, Rachel S. Nargi<sup>1</sup>, Elad Binshtein<sup>1</sup>, Xuping Xie<sup>7</sup>,  
8 Xianwen Zhan<sup>7</sup>, Pei-Yong Shi<sup>7</sup>, James Logue<sup>8</sup>, Stuart Weston<sup>8</sup>, Marisa E. McGrath<sup>8</sup>, Matthew B.  
9 Frieman<sup>8</sup>, Tyler Brady<sup>9</sup>, Kevin Tuffy<sup>9</sup>, Helen Bright<sup>9</sup>, Yueh-Ming Loo<sup>9</sup>, Patrick McTamney<sup>9</sup>, Mark  
10 Esser<sup>9</sup>, Robert H. Carnahan<sup>1,10</sup>, Michael S. Diamond<sup>5,6,11,12</sup>, Jesse D. Bloom<sup>2,3,13</sup>, James E. Crowe,  
11 Jr.<sup>1,4,10\*</sup>

12  
13 **Affiliations:**

14 <sup>1</sup>Vanderbilt Vaccine Center, Vanderbilt University Medical Center, Nashville, TN 37232, USA

15 <sup>2</sup>Basic Sciences Division, Fred Hutchinson Cancer Research Center, Seattle, WA 98109, USA

16 <sup>3</sup>Department of Genome Sciences & Medical Scientist Training Program, University of  
17 Washington, Seattle, WA 98195, USA

18 <sup>4</sup>Department of Pathology, Microbiology, and Immunology, Vanderbilt University Medical  
19 Center, Nashville, TN, 37232, USA

20 <sup>5</sup>Department of Pathology and Immunology, Washington University School of Medicine,  
21 Saint Louis, MO, 63110, USA

22 <sup>6</sup>Department of Medicine, Washington University School of Medicine, Saint Louis, MO,  
23 63110, USA

24 Department of Biochemistry & Molecular Biology, The University of Texas Medical Branch  
25 at Galveston, Galveston, TX, 77555, USA

26 Department of Microbiology and Immunology, The University of Maryland, College Park,  
27 MD, 20742, USA

28 <sup>9</sup>Microbial Sciences, AstraZeneca, One MedImmune Way, Gaithersburg, MD 20878, USA

29 <sup>10</sup>Department of Pediatrics, Vanderbilt University Medical Center, Nashville, TN, 37232, USA

30 <sup>11</sup>Department of Molecular Microbiology, Washington University School of Medicine, Saint  
31 Louis, MO, 63110, USA

32 <sup>12</sup>Andrew M. and Jane M. Bursky Center for Human Immunology and Immunotherapy  
33 Programs, Washington University School of Medicine, Saint Louis, MO, 63110, USA

34 <sup>13</sup>Howard Hughes Medical Institute, Seattle, WA, 98109, USA

35

36 \*Correspondence to: James E. Crowe, Jr., M.D., [james.crowe@vumc.org](mailto:james.crowe@vumc.org)

37

38 **Contact information:**

39 **James E. Crowe, Jr., M.D. [LEAD CONTACT]**

40 Departments of Pediatrics, Pathology, Microbiology, and Immunology, and the Vanderbilt  
41 Vaccine Center

42 **Mail:**

43 Vanderbilt Vaccine Center

44 11475 Medical Research Building IV

45 2213 Garland Avenue

46 Nashville, TN 37232-0417, USA

47        **Telephone**        (615) 343-8064

48        **Email**                [james.crowe@vumc.org](mailto:james.crowe@vumc.org)

49

50    **Additional Title Page Footnotes**

51    \*Corresponding author

52

53

54    **Keywords:** Coronavirus; SARS-CoV-2; SARS-CoV; COVID-19; Antibodies, Monoclonal;

55    Human; Adaptive Immunity.

56 **The SARS-CoV-2 pandemic has led to an urgent need to understand the molecular basis**  
57 **for immune recognition of SARS-CoV-2 spike (S) glycoprotein antigenic sites. To define the**  
58 **genetic and structural basis for SARS-CoV-2 neutralization, we determined the structures**  
59 **of two human monoclonal antibodies COV2-2196 and COV2-2130<sup>1</sup>, which form the basis of**  
60 **the investigational antibody cocktail AZD7442, in complex with the receptor binding**  
61 **domain (RBD) of SARS-CoV-2. COV2-2196 forms an “aromatic cage” at the heavy/light**  
62 **chain interface using germline-encoded residues in complementarity determining regions**  
63 **(CDRs) 2 and 3 of the heavy chain and CDRs 1 and 3 of the light chain. These structural**  
64 **features explain why highly similar antibodies (public clonotypes) have been isolated from**  
65 **multiple individuals<sup>1-4</sup>. The structure of COV2-2130 reveals that an unusually long LCDR1**  
66 **and HCDR3 make interactions with the opposite face of the RBD from that of COV2-2196.**  
67 **Using deep mutational scanning and neutralization escape selection experiments, we**  
68 **comprehensively mapped the critical residues of both antibodies and identified positions of**  
69 **concern for possible viral escape. Nonetheless, both COV2-2196 and COV2130 showed**  
70 **strong neutralizing activity against SARS-CoV-2 strain with recent variations of concern**  
71 **including E484K, N501Y, and D614G substitutions. These studies reveal germline-encoded**  
72 **antibody features enabling recognition of the RBD and demonstrate the activity of a**  
73 **cocktail like AZD7442 in preventing escape from emerging variant viruses.**

74

75 The current coronavirus disease 2019 (COVID-19) pandemic is caused by SARS-CoV-2, a clade  
76 B betacoronavirus (*Sarbecovirus* subgenus) with 96.2% or 79.6% genome sequence identity to  
77 the bat coronavirus RaTG13 or SARS-CoV respectively<sup>5,6</sup>. The S glycoprotein mediates viral  
78 attachment via binding to the host receptor angiotensin converting enzyme 2 (ACE2) and

79 possibly other host factors, and subsequent entry into cells after priming by the host  
80 transmembrane protease serine 2 (TMPRSS2)<sup>7-9</sup>. The trimeric S protein consists of two subunits,  
81 designated S1 and S2. The S1 subunit binds to ACE2 with its receptor binding domain (RBD),  
82 while the central trimeric S2 subunits function as a fusion apparatus after S protein sheds the S1  
83 subunits<sup>10</sup>. The human humoral immune response to SARS-CoV-2 has been well documented<sup>11-  
84 13</sup>, and numerous groups have isolated monoclonal antibodies (mAbs) that react to SARS-CoV-2  
85 S protein from the B cells of patients previously infected with the virus. A subset of the human  
86 mAbs neutralize virus *in vitro* and protect against disease in animal models<sup>1,2,13-21</sup>. Studies of the  
87 human B cell response to the virus have been focused mostly on S protein so far, due to its  
88 critical functions in attachment and entry into host cells<sup>1,2,13-21</sup>. For these S-protein-targeting  
89 antibodies, the RBD of S protein is the dominant target of human neutralizing antibody  
90 responses<sup>1,2,13-21</sup>. This high frequency of molecular recognition may be related to the accessibility  
91 of the RBD to B cell receptors, stemming from a low number of obscuring glycosylation sites  
92 (only 2 sites on the RBD versus 8 or 9 sites on the N-terminal domain [NTD] or S2 subunit,  
93 respectively)<sup>13</sup>. The RBD also occupies an apical position and exhibits exposure due to the  
94 “open-closed” dynamics of the S trimer observed in S protein cryo-EM structures<sup>22-24</sup>. Potently  
95 neutralizing mAbs predominantly target the RBD, since this region is directly involved in  
96 receptor binding.

97

98 In previous studies, we isolated a large panel of SARS-CoV-2 S-protein-reactive human  
99 monoclonal antibodies from the B cells of patients previously infected with the virus. that bind to  
100 the SARS-CoV-2 S protein<sup>25</sup>. A subset of these monoclonal antibodies were shown to bind to  
101 recombinant RBD and S protein ectodomain and exhibit neutralization activity against SARS-

102 CoV-2 by blocking S-protein-mediated binding to receptor<sup>1</sup>. Two noncompeting antibodies,  
103 designated COV2-2196 and COV2-2130, synergistically neutralized SARS-CoV-2 *in vitro* and  
104 protected against SARS-CoV-2 infection in mouse models and a rhesus macaque model when  
105 used separately or in combination. Several Phase III clinical trials are ongoing to study  
106 AZD7442 incorporating the variable regions in this mAb combination for post-exposure  
107 prophylaxis (ClinicalTrials.gov Identifier: NCT04625972), prevention (Identifier:  
108 NCT04625725), out-patient treatment (Identifier: NCT04723394 and NCT04518410) and in-  
109 patient treatment (NCT04501978) of COVID-19. Thus, it is of importance to define the binding  
110 sites of these two antibodies to understand how they interact with the RBD and their ability to  
111 neutralize new virus variants.

112  
113 One of these antibodies (COV2-2196) is a member of a public clonotype, meaning this antibody  
114 shares similar variable region genetic features with other antibodies isolated from different  
115 individuals. Here, by studying the interaction of COV2-2196 with RBD in detail, we identify the  
116 molecular basis for selection of a public clonotype for SARS-CoV-2 that is driven by a complex  
117 structural configuration involving both *IGHV1-58-IGHJ3* heavy chain and *IGKV3-20-IGKJ1*  
118 light chain recombinations. The shared structural features of this clonotype contribute to the  
119 formation of a paratope comprising residues in both the heavy and light chains, but remarkably  
120 are independent of the HCDR3 that usually dominates antigen-antibody interactions. Detailed  
121 structural studies revealed that the commonly formed antibody paratope contributes an “aromatic  
122 cage” formed by five aromatic residues in the paratope surrounding the interface of the heavy  
123 and light chains. This cage structure coordinates an aromatic residue on the SARS-CoV-2 S  
124 protein, accounting for the high specificity and affinity of these antibodies. Remarkably,

125 although both the heavy and light chains are required to form this public clonotype (thus defining  
126 canonical *IGHV*, *IGHJ*, *IGLV* and *IGLJ* genes in the clonotype), the HCDR3 minimally affects  
127 the interaction. Since these *IGHV1-58-IGHJ3* heavy chain and *IGKV3-20-IGKJ1* light chain  
128 recombinations are common in the pre-immune B cell repertoire, many individuals likely make  
129 such clones during the response to SARS-CoV-2 infection or vaccination. The antigenic site  
130 recognized by the complex pre-configured structure of this public clonotype is likely an  
131 important component of a protective vaccine for COVID-19 because of the frequency of the B  
132 cell clone in the human population and the neutralizing and protective potency of the antibodies  
133 encoded by the variable gene segments.

134  
135 An antibody cocktail including half-life extended versions of COV2-2196 and a non-competing  
136 RBD-specific neutralizing antibody, COV2-2130, is being investigated for both prophylaxis and  
137 therapy in the trials cited above. To understand the molecular details of the recognition of RBD  
138 by COV2-2196 and COV2-2130, we determined the crystal structures of the S protein RBD in  
139 complex with COV2-2196 at 2.50 Å (**Fig. 1, Extended Data Table 1**) and in complex with both  
140 COV2-2196 and COV2-2130 at 3.00 Å (**Fig. 2, Extended Data Table 1**). The substructure of  
141 RBD-COV2-2196 in the RBD-COV2-2196-2130 complex is superimposable with the structure  
142 of the RBD-COV2-2196 complex (**Extended Data Fig. 1**). The buried surface area of the  
143 interface between COV2-2196 and the RBD is about 650 Å<sup>2</sup> in both crystal structures, and that  
144 of the interface between COV2-2130 and RBD is about 740 Å<sup>2</sup>. COV2-2196 binds to the  
145 receptor-binding ridge of RBD, and COV2-2130 binds to one side of the RBD edge around  
146 residue K444 and the saddle region of the receptor binding motif RBM), both partially  
147 overlapping the ACE2 binding site (**Fig. 1a-b, 2a-b**). These features explain the competition

148 between the antibodies and ACE2 for RBD binding from our previous study, *e.g.*, both COV2-  
149 2196 and COV2-2130 neutralize the virus by blocking RBD access to the human receptor  
150 ACE2<sup>1</sup>. Aromatic residues from the COV2-2196 heavy and light chains form a hydrophobic  
151 pocket that surrounds RBD residue F486 and adjacent residues (G485, N487) (**Fig. 1a, 1d, 1e;**  
152 **Extended Data Fig. 2a-c**). This mode of antibody-antigen interaction is unusual in that the  
153 formation of the antibody pocket is caused by wide spatial separation of the HCDR3 and  
154 LCDR3. In addition, although the antigenic site recognized by COV2-2196 is not buried at the  
155 interface between protomers of S trimer *per se*, COV2-2196 is not able to bind RBD in the  
156 “down” conformation due to steric clashes with RBD in an adjacent S protomer. Therefore,  
157 COV2-2196 only binds to RBD in the “up” conformation (**Fig. 1c**). Overlays of the substructure  
158 of RBD in complex with COV2-2130 (**Fig. 2c**) and the structure of RBD in complex with both  
159 COV2-2196 and COV2-2130 (**Fig. 2d**) indicate that COV2-2130 is able to bind RBD in both  
160 “up” and “down” conformations of the S trimer. These structural findings are consistent with our  
161 previous lower resolution results for the complex using negative stain electron microscopy<sup>1</sup>.

162  
163 Structural analysis of COV2-2196 in complex with RBD reveals how COV2-2196 recognizes the  
164 receptor-binding ridge on the RBD. One of the major contact residues, F486, situates at the  
165 center of the binding site, interacting extensively with the hydrophobic pocket (residue P99 of  
166 heavy chain and an “aromatic cage” formed by 5 aromatic side chains) between COV2-2196  
167 heavy/light chains via a hydrophobic effect and van der Waals interactions (**Fig. 1d-e, Extended**  
168 **Data Fig. 2a-b**). A hydrogen bond (H-bond) network, constructed with 4 direct antibody-RBD  
169 H-bonds and 16 water-mediated H-bonds, surround residue F486 and strengthen the antibody-  
170 RBD interaction (**Extended Data Fig. 2c**). Importantly, for all residues except one (residue P99



171 of the heavy chain) that interact extensively with the epitope, they are encoded by germline  
172 sequences (*IGHV1-58\*01* and *IGHJ3\*02* for the heavy chain, *IGKV3-20\*01* and *IGKJ1\*01* for  
173 the light chain) (**Fig. 3a**) or only their backbone atoms are involved in the antibody-RBD  
174 interactions, such as heavy chain N107 and G99 and light chain S94. We noted another antibody  
175 in the literature, S2E12, that is encoded by the same *IGHV/IGHJ* and *IGKV/IGKJ*  
176 recombinations, with similar but most likely different *IGHD* genes to those of COV2-2196  
177 (*IGHD2-15* vs *IGHD2-2*)<sup>4</sup>. A comparison of the cryo-EM structure of S2E12 in complex with S  
178 protein (PDB 7K4N) suggests that the mAb S2E12 likely uses nearly identical antibody-RBD  
179 interactions as those of COV2-2196, although variations in conformations of interface residue  
180 side-chains can be seen (**Extended Data Fig. 2d**). For example, the phenyl rings of light chain  
181 residue Y92 are perpendicular to each other in the two structures. These analyses suggest that  
182 COV2-2196 and S2E12 have similar modes of recognition of RBD.

183  
184 We searched genetic databases to determine if these structural features are present in additional  
185 SARS-CoV-2 mAbs isolated by others and found additional members of the clonotype (**Fig 3a**).  
186 Two other studies reported the same or a similar clonotype of antibodies isolated from multiple  
187 COVID-19 convalescent patients<sup>2,4</sup>, and one study found three antibodies with the same *IGHV1-*  
188 *58* and *IGKV3-20* pairing, without providing information on D or J gene usage<sup>3</sup>. All of these  
189 antibodies are reported to bind SARS-CoV-2 RBD avidly and to neutralize virus with high  
190 potency<sup>1-4</sup>. So far, there are only two atomic resolution structures of antibodies encoded by these  
191  $V_H(D_H)J_H$  and  $V_K-J_K$  recombinations available, the structure for COV2-2196 presented here and  
192 that for S2E12<sup>4</sup>. We performed homology modeling for two additional antibodies of this  
193 clonotype from our own panel of anti-SARS-CoV-2 antibodies, designated COV2-2072 and

194 COV2-2381. As expected, given that these antibodies are members of a shared genetic  
195 clonotype, the modeled structures of COV2-2072/RBD and COV2-2381/RBD complexes are  
196 virtually superimposable with those of COV2-2196/RBD and S2E12/RBD at the antibody-RBD  
197 interfaces (**Extended Data Fig. 3a-e**). Additionally, COV2-2072 encodes an N-linked  
198 glycosylation sequon in the HCDR3 (**Extended Data Fig. 3d**), an unusual feature for antibodies,  
199 given that glycosylation of CDRs might adversely affect antigen recognition. However, the  
200 COV2-2196 structure shows that the disulfide-stapled HCDR3 in this clonotype is angled away  
201 from the binding site, explaining how this unusual HCDR3 glycosylation in COV2-2072 can be  
202 tolerated without compromising binding (**Extended Data Fig. 3e**).

203

204 We next determined whether we could identify potential precursors of this public clonotype in  
205 the antibody variable gene repertoires of circulating B cells from SARS-CoV-2-naïve  
206 individuals. We searched for the V(D)J and VJ genes in previously described comprehensive  
207 repertoire datasets originating from 3 healthy human donors, without a history of SARS-CoV-2  
208 infection, and in datasets from cord blood collected prior to the COVID-19 pandemic<sup>26</sup>. A total  
209 of 386, 193, 47, or 7 heavy chain sequences for this SARS-CoV-2 reactive public clonotype was  
210 found in each donor or cord blood repertoire, respectively (**Extended Data Fig. 4a**).  
211 Additionally, we found 516,738 human antibody sequences with the same light chain V-J  
212 recombination (*IGKV3-20-IGKJ1\*01*). A total of 103,534, 191,039, or 222,165 light chain  
213 sequences was found for this public clonotype in each donor respectively. Due to the large  
214 number of sequences, the top five abundant sequences were aligned from each donor. Multiple  
215 sequence alignments were generated for each donor's sequences and logo plots were generated.

216 The top 5 sequences with the same recombination event in each donor were identical, resulting in  
217 the same logo plots (**Extended Data Fig. 4a-b**).

218 We noted that 8 of the 9 common residues important for RBD binding in the antibody  
219 were encoded by germline gene sequences. Interestingly, these residues were present in all 14  
220 members of the public clonotype that we or others have described (**Fig. 3a**)<sup>1-4</sup>. To validate the  
221 importance of these features, we expressed variant antibodies with point mutations in the  
222 paratope to determine the effect of variation at conserved residues (**Fig. 3b**).

223  
224 Altering the D108 residue to A, N, or E had little effect, but removing the disulfide bond in the  
225 HCDR3 through cysteine to alanine substitutions greatly reduced binding. While altering the P99  
226 residue to V or N had little effect, a P99G substitution had a dramatic effect on binding.  
227 Additionally, we made two germline revertants of the COV2-2196 antibody. The P99 residue is  
228 not templated by either the V-gene *IGHV 1-58* nor the D gene *IGHD 2-2*. However, *IGHD 2-2*  
229 has a likely templated G at position 99. Therefore, two germline revertants were tested - one with  
230 P99 and the other with G99. As the P99 residue orients the HCDR3 loop away from the  
231 interaction site with antigen, the G00 germline revertant exhibited reduced binding, whereas the  
232 P99 germline revertant bound antigen equivalently to *wt* COV2-2196 (**Fig 3b**).

233  
234 An antibody based on the COV2-2196 variable region is being tested in combination with an  
235 antibody based on the COV2-2130 variable region in clinical trials. Unlike, COV2-2196,  
236 COV2-2130 uses the HCDR3 for critical contacts. The HCDR3 comprises 22 amino acid  
237 residues, which is relatively long for human antibodies. The HCDR3 forms a long, structured  
238 loop made up of small loops, is stabilized by short-ranged hydrogen bonds and hydrophobic

239 interactions/aromatic stackings within the HCDR3, and is further strengthened by its interactions  
240 (hydrogen bonds and aromatic stackings) with residues of the light chain (**Extended Data Fig.**  
241 **5a-b**). The COV2-2130 heavy and light chains are encoded by the germline genes *IGHV3-15* and  
242 *IGKV4-1*, respectively, and the two genes encode the longest germline-encoded HCDR2 (10 aa)  
243 and LCDR1 (12 aa) loops, which are used in COV2-2130. The heavy chain V(D)J  
244 recombination, HCDR3 mutations, and the pairing of heavy and light chains result in a binding  
245 cleft between the heavy and light chains, matching the shape of the RBD region centered at S443  
246 – Y449 loop (**Fig. 2a, Extended Data Fig. 5c**). Closely related to these structural features, only  
247 HCDR3, LCDR1, HCDR2, and LCDR2 are involved in the formation of the paratope (**Fig. 2e-f,**  
248 **Extended Data Fig. 2e-f**). Inspection of the antibody-RBD interface reveals a region that likely  
249 drives much of the energy of interaction. The RBD residue K444 sidechain is surrounded by  
250 subloop Y104 – V109 of the HCDR3 loop, and the positive charge on the side chain nitrogen  
251 atom is neutralized by the HCDR3 residue D107 side chain, three mainchain carbonyl oxygen  
252 atoms from Y105, D107, and V109, and the electron-rich face of the Y104 phenyl ring (cation- $\pi$   
253 interaction) (**Extended Data Fig. 2e**). Since the interacting atoms are completely protected from  
254 solvent, the highly concentrated interactions within such a restricted space are energetically  
255 favorable. Furthermore, this “hotspot” of the antibody-RBD interface is surrounded by or  
256 protected from the solvent by antibody-RBD interactions with lesser free energy gains, including  
257 salt bridge between the RBD residue R346 and HCDR2 D56, electrostatic interaction between  
258 RBD R346 and the mainchain oxygen of HCDR3 Y106, a hydrogen bond between RBD N450  
259 and HCDR3 Y105 mainchain oxygen, a hydrogen bond between RBD V445 mainchain oxygen  
260 and HCDR3 Y104 sidechain, a hydrophobic interaction between V445 sidechain and sidechains  
261 of HCDR3 L113 and F118 (**Extended Data Fig. 2e**). Also, aromatic stacking between the

262 HCDR3 residue Y105 and LCDR2 residue W56 participates in the shielding of the “hotspot”  
263 from solvent (**Extended Data Fig. 2e**). In addition, COV2-2130 light chain LCDR1 and LCDR2  
264 make extensive contacts with the RBD. Among them, the LCDR1 S32 sidechain, S33 mainchain  
265 oxygen, N34 sidechain, and LCDR2 Y55 sidechain form hydrogen bonds with RBD E484  
266 sidechain, S494 mainchain nitrogen, Y449 mainchain oxygen, and G446 mainchain nitrogen  
267 (**Extended Data Fig. 2f**). Residues LCDR1 K36, Y38, and LCDR2 W56 interact with the RBD  
268 Y449 via aromatic stackings and cation- $\pi$  interactions, forming an “interaction cluster”  
269 (**Extended Data Fig. 2f**), although these interactions are likely not energetically as strong as in  
270 the case of RBD K444. In the crystal structure of the RBD in complex with both COV2-2196  
271 and COV2-2130, we noted a possible interaction between the closely spaced COV2-2196 and  
272 COV2-2130 Fabs (**Extended Data Fig. 6**).

273  
274 To better understand the RBD sites critical for binding of COV2-2196 and COV2-2130, we used  
275 a deep mutational scanning (DMS) approach to map all mutations to the RBD that escape  
276 antibody binding<sup>27</sup>; (**Extended Data Fig. 7**). For both antibodies, we identified several key  
277 positions, all in the antibody binding site, where RBD mutations strongly disrupted binding (**Fig.**  
278 **4a-d**). We leveraged our previous work quantifying the effects of RBD mutations on ACE2  
279 binding<sup>28</sup> to overlay the effect on ACE2 binding for mutations that abrogated antibody binding to  
280 RBD (**Fig. 4a,b**). For COV2-2196, many mutations to F486 and N487 had escape fractions  
281 approaching 1 (*i.e.*, those RBD variants to which the antibody does not bind), reinforcing the  
282 importance of the contributions of these two residues to antibody binding. Similarly, for COV2-  
283 2130, mutation of residue K444 to any of the other 19 amino acids abrogated antibody binding,  
284 indicating that the lysine at this position is critical for the antibody-RBD interaction.

285  
286 Nevertheless, not all antibody binding site residues were identified as sites where mutations  
287 greatly reduced binding. Several explanations are possible: 1) some binding site residues may not  
288 be critical for binding, 2) some RBD residues do not use their side chains to form interactions  
289 with the mAbs or 3) mutations at some sites may not be tolerated for RBD expression<sup>28</sup>. For  
290 instance, residues L455, F456, and Q493 are part of the structurally-defined binding site for  
291 COV2-2196 (**Fig. 1d**), but mutations to these sites did not impact antibody binding detectably  
292 (**Fig. 4a and c**), suggesting that these residues do not make critical binding contributions.  
293 Superimposition of the COV2-2196/RBD structure onto the S2E12/RBD structure clearly  
294 demonstrates a flexible hinge region between the RBD ridge and the rest of the RBD that is  
295 maintained when antibody is bound (**Extended Data Fig. 2d**). This finding indicates that  
296 mutations at these three positions could be well-tolerated for antibody-RBD binding and supports  
297 the non-essential nature of these particular residues for COV2-2196 or S2E12 binding.

298  
299 Importantly, COV2-2196 and COV2-2130 do not compete with one another for binding to the  
300 RBD<sup>1</sup>, suggesting they could comprise an escape-resistant cocktail for prophylactic or  
301 therapeutic use. Indeed, the binding sites and escape variant maps for these two antibodies are  
302 non-overlapping. To test whether there were single mutations that could escape binding of both  
303 antibodies, we performed escape variant mapping experiments with a 1:1 mixture of the COV2-  
304 2196 and COV2-2130 antibodies, but we did not detect any mutation that had an escape fraction  
305 of greater than 0.2, whereas the mutations with the largest effects for each of the single  
306 antibodies was approximately 1 (**Extended Data Fig. 7d**).

307

308 Although these experiments map all mutations that escape antibody binding to the RBD, we also  
309 sought to determine which mutations have the potential to arise during viral growth. To address  
310 this question, we first attempted to select escape mutations using a recombinant VSV expressing  
311 the SARS-CoV-2 S glycoprotein (VSV-SARS-CoV-2)<sup>29</sup>; (**Fig 4e**). We expected that the only  
312 amino acid mutations that would be selected during viral growth were those 1) arising by single-  
313 nucleotide RNA changes, 2) causing minimal deleterious effect on ACE2 binding and  
314 expression, and 3) substantially impacting antibody binding<sup>27,28</sup>. Indeed, we did not detect any  
315 COV2-2196-induced mutations that were both single-nucleotide accessible and relatively well-  
316 tolerated with respect to effects on ACE2 binding (**Fig. 4b**), which may explain why escape  
317 mutants were not selected in any of the 88 independent replicates of recombinant VSV growth in  
318 the presence of antibody (**Fig. 4e Extended Data Fig. 7g**). For COV2-2130, mutations to site  
319 K444, a site that is relatively tolerant to mutation<sup>28</sup>, demonstrated the most frequent escape from  
320 antibody binding in neutralization assays with the the VSV chimeric virus. K444R (selected in 6  
321 out of 20 replicates) or K444E (selected in 2 out of 20 replicates) were identified in 40% of the  
322 replicates of recombinant VSV growth in the presence of COV2-2130 (**Fig. 4e, Extended Data**  
323 **Fig. 7g**).

324  
325 To explore resistance with authentic infectious virus, SARS-CoV-2 strain USA-WA1/2020 was  
326 passaged serially in Vero cell monolayer cultures with the clinical antibodies based on COV2-  
327 2196 (AZD8895), COV2-2130 (AZD1061) or their 1:1 combination (AZD7442), at  
328 concentrations beginning at their respective IC<sub>50</sub> values and increased step-wise to their IC<sub>90</sub>  
329 value with each passage (**Extended Data Fig. 8**). As a control, virus was passaged in the  
330 absence of antibody. Following the final passage, viruses were evaluated for susceptibility

331 against the partner antibody at a final concentration of 10 times the IC<sub>90</sub> concentration by plaque  
332 assay. We did not detect any plaques resistant to neutralization by AZD8895 (based on COV2-  
333 2196) or the AZD7442 cocktail. Virus that was passaged serially in AZD1061 formed plaques to  
334 a titer of  $1.2 \times 10^7$  PFU/mL after selection in  $10 \times$  the IC<sub>90</sub> value concentration of AZD1061, but  
335 plaques were not formed with AZD7442. Plaques (n=6) were selected randomly, and the S gene  
336 was amplified and sequenced, revealing the same 3 amino acid changes in all 6 of the  
337 independently selected and sequenced plaques: N74K, R346I and S686G (**Fig. 4f**). The S686G  
338 change has been reported previously to be associated with serial passaging of SARS-CoV-2 in  
339 Vero cells<sup>30</sup>, isolated from challenge studies in ferrets<sup>31</sup> or NHPs<sup>32</sup>, and is predicted to decrease  
340 furin activity<sup>30</sup>. The N74K residue is located in the N-terminal domain outside of the AZD1061  
341 binding site and results in the loss of a glycan<sup>33</sup>. The R346I residue is located in the binding site  
342 of AZD1061 and may be associated with AZD1061-resistance. The impact of the R346I changes  
343 on AZD1061 (COV2-2130) binding to S protein is shown in **Fig. 4g**. The K444R and K444E  
344 substitutions selected in the VSV-SARS-CoV-2 system and the R346I substitution selected by  
345 passage with authentic SARS-CoV-2 are accessible by single nucleotide substitution and  
346 preserve ACE2 binding activity (**Fig. 4g**), indicating that our DMS analysis predicted the  
347 mutations selected in the presence of COV2-2130 antibody. Taken together, these results  
348 comprehensively map the effects of all amino acid substitutions on the binding of COV2-2196  
349 and COV2-2130 and identify sites of possible concern for viral evolution. That said, variants  
350 containing mutations at residues K444 and R346 are rare among all sequenced viruses present in  
351 the GISAID databases (all  $\leq 0.01\%$  when accessed on 12/23/20).

352



353 Recently, viral variants with increased transmissibility and potential antigenic mutations have  
354 been reported in clinical isolates<sup>34-37</sup>. We tested whether some of the variant residues in these  
355 rapidly emerging strains would abrogate the activity of these potentially neutralizing antibodies.  
356 We tested isogenic D614G and E484K variants in the WA-1 strain background (2019n-  
357 CoV/USA\_WA1/2020, [WA-1]), all prepared as authentic SARS-CoV-2 viruses and used in  
358 focus reduction neutralization tests<sup>29</sup>. The E484K mutation was of special interest, since this  
359 residue is located within 4.5 Å of each of the mAbs in the complex of Fabs and RBD, albeit at  
360 the very binding site. E484K also is present in emerging lineages B.1.351 (501Y.V2)<sup>36</sup> and P.1  
361 (501Y.V3)<sup>37</sup>, and has been demonstrated to alter the binding of some monoclonal antibodies<sup>38,39</sup>  
362 as well as human polyclonal serum antibodies<sup>40</sup>. Variants containing E484K also have been  
363 shown to be neutralized less efficiently by convalescent serum and plasma from SARS-CoV-2  
364 survivors<sup>41-43</sup>. For COV2-2196, COV2-2130, and COV2-2050 (a third neutralizing antibody we  
365 included for comparison as it interacts with the residue E484), we found virtually no impact of  
366 the D614G mutation (**Fig. 4h**). However, we did observe effects on neutralization with the  
367 D614G/E484K virus. COV2-2050 completely lost neutralization activity, consistent with our  
368 previous study defining E484K as a mutation abrogating COV2-2050 binding<sup>27</sup>. In contrast,  
369 COV2-2196, COV2-2130, and COV2-2196 + COV2-2130 showed only minor reduction in  
370 inhibitory capacity (2- to 5-fold increases in IC<sub>50</sub> values).

371

372 **Discussion.** The process of B cell development, in which diverse variable gene segments are  
373 recombined, results in human naïve B cell repertoires containing an enormous amount of  
374 structural diversity in the complementarity determining regions (CDRs) of the antibodies (Abs)  
375 that they encode. Despite this extensive and diverse pool of naïve B cells, infection or

376 vaccination with viral pathogens sometimes elicit antibodies in diverse individuals that share  
377 common structural features encoded by the same antibody variable genes. Examples of recurring  
378 variable gene usage have been described for antibody responses to human rotavirus<sup>21,44</sup>, human  
379 immunodeficiency virus<sup>45-48</sup> influenza A virus<sup>49-52</sup>, and hepatitis C virus<sup>53,54</sup>, among others. The  
380 recognition of the use of common variable genes in antiviral responses has led to the general  
381 concept of B cell public clonotypes, or B cells with similar genetic features in their variable  
382 regions that encode for antibodies with similar patterns of specificity and function in different  
383 individuals. A number of recent reports have described the identification of public clonotypes in  
384 the Ab responses to SARS-CoV-2<sup>2,14,55,56</sup>. Identifying and understanding the genetic and  
385 structural basis for selection of public clonotypes is valuable, as this information forms the  
386 central conceptual underpinning for many current rational structure-based vaccine design  
387 efforts<sup>57</sup>. Our structural analyses define the molecular basis for the frequent selection of a public  
388 clonotype of human antibodies sharing heavy chain V-D-J and light chain V-J recombinations  
389 that target the same region of the SARS-CoV-2 S RBD. Germline antibody gene-encoded  
390 residues in heavy and light chains play a vital role in antigen recognition, suggesting that few  
391 somatic mutations are required for antibody maturation of this clonotype. The existence of  
392 potent neutralizing public clonotypes across multiple individuals may in part account for the  
393 remarkable efficacy of S protein-based vaccines that is being observed in the clinic. One might  
394 envision an opportunity to elicit serum neutralizing antibody titers with even higher  
395 neutralization potency using domain- or motif-based vaccine designs for this antigenic site to  
396 prime human immune responses to elicit this clonotype.  
397

398 The recent emergence of variant virus lineages with increased transmissibility and altered  
399 sequences in known sites of neutralization is concerning for the capacity of SARS-CoV-2 to  
400 evade current antibody countermeasures in development and testing. Our comprehensive  
401 mapping of the effect of RBD mutations on the binding of COV2-2196 and COV2130  
402 underscores their use as a rationally designed cocktail, given that they have orthogonal escape  
403 mutations. Our DMS experiments are also consistent with the binding site determined by our  
404 antibody-RBD crystal structures and the DMS results predict the mutations present in resistant  
405 variants selected by *in vitro* passaging experiments. We tested the activity of the individual  
406 antibodies or the cocktail against recombinant authentic viruses containing mutations from  
407 several important variants of concern, and demonstrate that the individual antibodies or their  
408 combination are capable of potently neutralizing these emerging variants. Recent work from  
409 others also has demonstrated that some circulating variants of concern exhibit substantial escape  
410 from neutralization of many human monoclonal antibodies in clinical development, but  
411 recombinant forms of COV2-2196 and COV2-2130 still potently neutralized pseudoviruses that  
412 included the emerging B.1.1.7 and B.1.351 lineages<sup>58</sup>. Taken together, this work defines the  
413 molecular basis for potent neutralization of SARS-CoV-2 by COV2-2196 and COV2-2130 and  
414 demonstrates that these antibodies efficiently neutralize emerging antigenic variants either  
415 separately or in combination, underscoring the promise of the AZD7442 investigational cocktail  
416 for use in the prevention and treatment of COVID-19.

417 **Data and materials availability:** The crystal structures reported in this paper have been  
418 deposited to the Protein Data Bank (<https://www.rcsb.org>) under the accession numbers 7L7D  
419 (COV2-2196 + RBD) and 7L7E COV2-2196 and COV2-2130 + RBD). The following were  
420 obtained from the PDB and used for visualization or molecular replacement: PDB IDs: 7K4N,  
421 6M0J, 6XM4, 7CAK, 6ZOY, 6XC2, 5JRP. Sequence Read Archive deposition for the aligned  
422 human antibody gene repertoire data set is deposited at the NCBI: PRJNA511481. All other data  
423 are available in the main text or the supplementary materials. Requests for reagents may be  
424 directed to and be fulfilled by the Lead Contact: Dr. James E. Crowe, Jr.  
425 ([james.crowe@yumc.org](mailto:james.crowe@yumc.org)). Materials reported in this study will be made available but may  
426 require execution of a Materials Transfer Agreement.

427  
428 **Software availability.** The computational pipeline for the deep mutational scanning analysis of  
429 antibody escape mutations is available on GitHub: [https://github.com/jbloombiolab/SARS-CoV-2-](https://github.com/jbloombiolab/SARS-CoV-2-RBD_MAP_AZ_Abs)  
430 [RBD\\_MAP\\_AZ\\_Abs](https://github.com/jbloombiolab/SARS-CoV-2-RBD_MAP_AZ_Abs). The FASTQ files are available on the NCBI Sequence Read Archive  
431 under BioSample SAMN17532001 as part of BioProject PRJNA639956.. Per-mutation escape  
432 fractions are available on GitHub ([https://github.com/jbloombiolab/SARS-CoV-2-](https://github.com/jbloombiolab/SARS-CoV-2-RBD_MAP_AZ_Abs/blob/main/results/supp_data/AZ_cocktail_raw_data.csv)  
433 [RBD\\_MAP\\_AZ\\_Abs/blob/main/results/supp\\_data/AZ\\_cocktail\\_raw\\_data.csv](https://github.com/jbloombiolab/SARS-CoV-2-RBD_MAP_AZ_Abs/blob/main/results/supp_data/AZ_cocktail_raw_data.csv)) and in

434 **Supplementary Data Table 1.**

435  
436 **Acknowledgments:** At Fred Hutchinson Cancer Research Center, we thank Amin Addetia for  
437 experimental assistance, the Flow Cytometry and Genomics core facilities, and Scientific  
438 Computing, supported by ORIP grant S10OD028685. We thank Adrian Creanga and Barney  
439 Graham of the U.S. National Institutes of Health (N.I.H.) for the Vero-hACE2-TMPRSS2 cells.

440 At AstraZeneca, we thank Paul Warrener, Christopher Morehouse and Dave Tabor for virus  
441 genome sequencing and spike variant analysis, and Kuishu Ren for generation of protein  
442 reagents and related binding data. **Funding:** This work was supported by Defense Advanced  
443 Research Projects Agency (DARPA) grants HR0011-18-2-0001 and HR0011-18-3-0001; U.S.  
444 N.I.H. contracts 75N93019C00074 and 75N93019C00062; N.I.H. grants AI150739, AI130591,  
445 R35 HL145242, AI157155, AI141707, AI12893, AI083203, AI149928, AI095202, AI083203,  
446 and UL1TR001439, the Dolly Parton COVID-19 Research Fund at Vanderbilt, a grant from Fast  
447 Grants, Mercatus Center, George Mason University, and funding from AstraZeneca. T.N.S. is a  
448 Washington Research Foundation Innovation Fellow at the University of Washington Institute  
449 for Protein Design and a Howard Hughes Medical Institute Fellow of the Damon Runyon Cancer  
450 Research Foundation (DRG-2381-19. J.E.C. is a recipient of the 2019 Future Insight Prize from  
451 Merck KGaA, which supported this work with a grant. J.D.B. is an Investigator of the Howard  
452 Hughes Medical Institute. P.-Y.S. was supported by awards from the Sealy & Smith Foundation,  
453 Kleberg Foundation, the John S. Dunn Foundation, the Amon G. Carter Foundation, the Gilson  
454 Longenbaugh Foundation, and the Summerfield Robert Foundation. J.B.C. is supported by a  
455 Helen Hay Whitney Foundation postdoctoral fellowship. X-ray diffraction data were collected at  
456 Beamline 21-ID-F and 21-ID-G at the Advanced Photon Source, a U.S. Department of  
457 Energy (DOE) Office of Science User Facility operated for the Office of Science by Argonne  
458 National Laboratory under contract no. DE-AC02-06CH11357. Use of the LS-CAT Sector 21  
459 was supported by the Michigan Economic Development Corporation and the Michigan  
460 Technology Tri- Corridor (grant 085P1000817). Support for crystallography was provided from  
461 the Vanderbilt Center for Structural Biology. The content is solely the responsibility of the

462 authors and does not necessarily represent the official views of the U.S. government or the other  
463 sponsors.

464

465 **Author contributions:** J.D., S.J.Z., J.R., E.A., R.S., C.G., R.N., J.D.B., J.E.C.  
466 Conceptualization, J.D., S.J.Z., J.D.B. and J.E.C.; Investigation, J.D., S.J.Z., A.J.G., T.N.S,  
467 A.S.D., E.C.C., R.E.C., J.B.C., P.G., J.R., E.A., R.E.S., C.G., R.S.N.; X.X., X.Z., J.L., S.W.,  
468 M.E.M., M.B.F., T.B., K.T., H.B., Y.M-L., P.M.; Writing – Original Draft, J.D., S.J.Z. and  
469 J.E.C; All authors edited the manuscript and approved the final submission); Supervision, P.-  
470 Y.S, M.S.D., J.D.B., J.E.C.; Funding acquisition, P.-Y.S., M.E., R.H.C., M.S.D., J.D.B., J.E.C.

471

472 **Competing interests:** T.B., K.T., H.B., Y.M-L., P.M., and M.E. are employees of and may own  
473 stock in AstraZeneca. M.S.D. is a consultant for Inbios, Vir Biotechnology, NGM  
474 Biopharmaceuticals, and Carnival Corporation and on the Scientific Advisory Boards of  
475 Moderna and Immunome. The Diamond laboratory has received funding support in sponsored  
476 research agreements from Moderna, Vir Biotechnology, and Emergent BioSolutions. All other  
477 authors declare no competing interests. J.E.C. has served as a consultant for Eli Lilly,  
478 GlaxoSmithKline and Luna Biologics, is a member of the Scientific Advisory Boards of  
479 CompuVax and Meissa Vaccines and is Founder of IDBiologics. The Crowe laboratory at  
480 Vanderbilt University Medical Center has received sponsored research agreements from  
481 IDBiologics and AstraZeneca. Vanderbilt University has applied for patents concerning  
482 antibodies that are related to this work.

483

484 **Additional information**

485

486 **Supplementary information** is available for this paper.

487

488 **Correspondence and requests for materials** should be addressed to J.E.C.

489

490 **FIGURE LEGENDS**

491

492 **Fig. 1. Crystal structure of S protein RBD in complex with Fab COV2-2196.**

493 **a.** Cartoon representation of COV2-2196 in complex with RBD. COV2-2196 heavy chain  
494 is shown in cyan, light chain in magenta, and RBD in green.

495 **b.** Structure of COV2-2196-RBD complex is superimposed onto the structure of RBD-  
496 human ACE2 complex (PDB ID: 6M0J), using the RBD structure as the reference. The  
497 color scheme of COV2-2196-RBD complex is the same as that in Fig. 1a. The RBD in  
498 the RBD-ACE2 complex is colored in light blue, the human ACE2 peptidase domain in  
499 grey.

500 **c.** Structure of COV2-2196-RBD complex is superimposed onto the structure of spike with  
501 single RBD in the “up” conformation (PDB ID: 6XM4), using the RBD in “up”  
502 conformation as the reference. The color scheme of COV2-2196-RBD complex is the  
503 same as that in Fig. 1a. The three subunits of spike are colored in grey, yellow, or light  
504 blue respectively (the subunit with its RBD in “up” conformation is yellow).

505 **d.** Surface representation of RBD epitope recognized by COV2-2196. The epitope residues  
506 are colored in different shades of green and labeled in black with the critical contact  
507 residue F486 labeled in white.

508 **e.** Antibody-antigen interactions between COV2-2196 and RBD. RBD is shown in the same  
509 surface representation and orientation as that in Fig. 1d. COV2-2196 paratope residues  
510 are shown in stick representation. The heavy chain is colored in cyan, and light chain is  
511 colored in magenta.



512 **Fig. 2. Crystal structure of S protein RBD in complex with both Fabs COV2-2196 and**  
513 **COV2-2130.**

514 **a.** Cartoon representation of crystal structure of S protein RBD in complex with COV2-2196  
515 and COV2-2130 Fabs. RBD is shown in green, COV2-2196 heavy chain in cyan, COV2-  
516 2196 light chain in magenta, COV2-2130 heavy chain in yellow, and COV2-2130 light  
517 chain in orange. CDRs of COV2-2130 are labeled.

518 **b.** Structure of COV2-2130-RBD complex is superimposed onto the structure of the RBD-  
519 ACE2 complex (PDB ID: 6M0J), using the RBD structure as the reference. The color  
520 scheme of the COV2-2130-RBD complex is the same to that of Fig. 2a. The RBD in the  
521 RBD-ACE2 complex is colored in light blue, the human ACE2 peptidase domain in grey.

522 **c.** Structure of COV2-2130-RBD complex is superimposed onto the structure of spike with  
523 all RBD in “down” conformation (PDB ID: 6Z0Y), using the RBD in one protomer as  
524 the reference. The color scheme of COV2-2130-RBD complex is the same as that in Fig.  
525 2a. The three protomers of spike are colored in grey, light blue, or purple respectively.

526 **d.** Structure of COV2-2196-2130-RBD complex is superimposed onto the structure of spike  
527 with one RBD in “up” conformation (PDB ID: 7CAK), using the RBD in “up”  
528 conformation as the reference. The color scheme of COV2-2130-RBD complex is the  
529 same as that in Fig. 2a. The three protomers of spike are colored in grey, light blue, or  
530 purple respectively.

531 **e.** Surface representation of RBD epitope recognized by COV2-2130. The epitope residues  
532 are indicated in different colors and labeled in black.

533 **f.** Interactions of COV2-2130 paratope residues with the epitope. RBD is shown in the same  
534 surface representation and orientation as those in Fig. 2e. The paratope residues are

535 shown in stick representation. The heavy chain is colored in yellow, and the light chain in  
536 orange.

537

538 **Fig. 3.**

539 **a.** IMGT/DomainGapAlign results of COV2-2196 heavy and light chains. Key interacting  
540 residues and their corresponding residues in germline genes are colored in red.

541 **b.** Binding curves of point mutants of COV2-2196. cDNAs encoding point mutants for the  
542 heavy chain, colored in red above, were designed, synthesized as DNA to make  
543 recombinant IgG proteins, and tested for binding activity to spike protein. Mutants of  
544 D108 residue are in blue, revertant mutation of inferred somatic mutations to germline  
545 sequence are in green, P99 mutants are in orange, and a mutant removing the disulfide  
546 bond in HCDR3 is in purple.

547

548 **Fig. 4. Identification of critical residues for COV2-2196 and COV2-2130 through deep**  
549 **mutational scanning coupled with resistant variant selection.**

550 **a.** Logo plots of mutation escape fractions of all at RBD sites with strong escape for COV2-  
551 2196 (left) or COV2-2130 (right). Taller letters indicate greater antibody binding escape.  
552 Mutations are colored based on the degree to which they reduce RBD binding to human  
553 ACE2. Data shown are the average of two independent escape selection experiments  
554 using two independent yeast libraries; correlations are shown in **Extended Data Figure**  
555 **7b,c.** Interactive, zoomable versions of these logo plots are at  
556 [https://jbloomlab.github.io/SARS-CoV-2-RBD\\_MAP\\_AZ\\_Abs/](https://jbloomlab.github.io/SARS-CoV-2-RBD_MAP_AZ_Abs/). We determined escape  
557 fractions, as described in methods, which represent the estimated fraction of cells

558 expressing that specific variant that fall in the antibody escape bin, such that a value of 0  
559 means the variant is always bound by antibody and a value of 1 means that it always  
560 escapes antibody binding.

561 **b.** Logo plots of mutation escape fractions for COV2-2196 and COV2-2130 that are  
562 accessible by single nucleotide substitutions from the Wuhan-Hu-1 reference strain used  
563 in escape selections (**e,f**). The effect of each substitution on ACE2 binding is represented  
564 as in Fig. 4a.

565 **c.** Left panel: mapping deep mutational scanning escape mutations for COV2-2196 onto the  
566 RBD surface in the RBD-COV2-2196 structure. Mutations that abrogate COV2-2196  
567 binding are displayed on the RBD structure using a heatmap, where blue represents the  
568 RBD site with the greatest cumulative antibody escape and white represents no detected  
569 escape. Grey denotes residues where deleterious effects on RBD expression prevented  
570 assessment of the effect of the mutation on antibody binding. Right panel: the blow-up of  
571 the left panel showing interacting residues around the strongest escape sites of RBD.  
572 COV2-2196 heavy chain is colored cyan and the light chain magenta. Two replicates  
573 were performed with independent libraries, as described in (a).

574 **d.** Right panel: mapping deep mutational scanning escape mutations for COV2-2130 onto  
575 the RBD surface in the RBD-COV2-2130 structure. Mutations that abrogate COV2-2130  
576 binding are displayed on the RBD structure using a heatmap as in **Fig. 4c**. Left panel: the  
577 blow-up of the left panel showing interacting residues around the strongest escape sites  
578 of RBD. COV2-2130 heavy chain is colored yellow and the light chain salmon.

579 **e.** Table showing the results of VSV-SARS-CoV-2 escape selection experiments with  
580 COV2-2196, COV2-2130, and their combination. The number of escape mutants

581 selected and the total number of escape selection replicates performed is noted, as well as  
582 the residues identified by sequencing escape mutant viruses.

583 **f.** Table showing the results of passage of SARS-CoV-2 in the presence of sub-neutralizing  
584 concentrations of AZD8895 (based on COV2-2196), AZD1061 (based on COV2-2130),  
585 and AZD7442 (AZD8895 + AZD1061). Resistance-associated viral mutations identified  
586 by sequencing neutralization-resistant plaques are denoted.

587 **g.** Scatter plot showing DMS data from (**a**), with mutation escape fraction on the x-axis and  
588 effect on ACE2 binding on the y-axis. Crosses denote mutations accessible only by  
589 multi-nucleotide substitutions, while circles indicate mutations accessible by single-  
590 nucleotide substitution. Amino acid substitutions selected by COV2-2130 in VSV-  
591 SARS-CoV-2 (K444R, K444E) or authentic SARS-CoV-2 (R346I) are denoted.

592 **h.** Antibody neutralization as measured by FRNT against reference strains and point  
593 mutants observed in SARS-CoV-2 variants of concern. Neutralization assays were  
594 performed in duplicate and repeated twice, with results shown from one experimental  
595 replicate. Error bars denote the range for each point. Mutations compared to the WA-1  
596 reference strain are denoted.

597

598 **Extended Data Fig. 1. Overlay of substructure of RBD-COV2-2196 in RBD-COV2-2196-**  
599 **2130 complex and RBD-COV2-2196 crystal structure.**

600

601 **Extended Data Fig. 2.** Similar aromatic stacking and hydrophobic interaction patterns at the  
602 RBD site F486 shared between RBD-COV2-2196 and spike-S2E12 complexes.

- 603        **a.** Same hydrogen bonding pattern surrounding residue F486 in the structures of the two  
604                complexes.
- 605        **b.** Detailed interactions between COV2-2196 and RBD. COV2-2196 heavy chain is colored  
606                in cyan, the light chain is colored in magenta, and RBD is colored in green. Important  
607                interacting residues are shown in stick representation. Water molecules involved in  
608                antibody-RBD interaction are represented as pink spheres. Direct hydrogen bonds are  
609                shown as orange dashed lines, and water-mediated hydrogen bonds as yellow dashed  
610                lines.
- 611        **c.** Superimposition of S2E12/RBD cryo-EM structure onto the COV2-2196/RBD crystal  
612                structure, with the variable domains of antibodies as references. COV2-2196 heavy chain  
613                is in cyan, and its light chain in magenta; S2E12 heavy chain is in pale cyan, and its light  
614                chain in light pink. The two corresponding RBD structures are colored in green or  
615                yellow, respectively.
- 616        **d.** Detailed interactions between COV2-2130 heavy chain and RBD. Paratope residues are  
617                shown in stick representation and colored in yellow, epitope residues in green sticks.  
618                Hydrogen-bonds or strong polar interactions are represented as dashed magenta lines.
- 619        **e.** Detailed interactions between COV2-2130 light chain and RBD. Paratope residues are  
620                shown in stick representation and colored in orange, epitope residues in green sticks.  
621                Hydrogen-bonds are represented as dashed magenta lines.

622

623        **Extended Data Fig. 3. A common clonotype of anti-RBD antibodies with the same binding**  
624        **mechanism.**

- 625        **a.** COV2-2196/RBD crystal structure.

- 626       **b.** S2E12/RBD cryo-EM structure.
- 627       **c.** COV2-2381/RBD homology model. COV2-2072 encodes an N-linked glycosylation  
628           sequon in the HCDR3, indicated by the gray spheres.
- 629       **d.** COV2-2072/RBD homology model.
- 630       **e.** Overlay of the COV2-2196/RBD crystal structure **(a)** and S2E12/RBD cryo-EM structure  
631           **(b)**.

632

633   **Extended Data Fig. 4.**

- 634       **a.** Detailed COV2-2130 HCDR3 loop structure. Short-range hydrogen bonds, stabilizing  
635           the loop conformation, are shown as dashed magenta lines.
- 636       **b.** Residues of COV2-2130 light chain form aromatic stacking interactions and hydrogen  
637           bonds with HCDR3 to further stabilize the HCDR3 loop.
- 638       **c.** Long LCDR1, HCDR2, and HCDR3 form complementary binding surface to the RBD  
639           epitope. RBD is shown as surface representation in grey. COV2-2130 heavy chain is  
640           colored in yellow with HCDR3 in orange, and the light chain in salmon with LCDR1 in  
641           magenta.
- 642       **d.** 180° rotation view of panel **c**.

643

- 644   **Extended Data Fig. 5. Interface between COV2-2196 and COV2-2130 in the crystal**  
645   **structure of RBD in complex with COV2-2196 and COV2-2130.** COV2-2196 heavy or light  
646   chain are shown as cartoon representation in cyan or magenta, respectively, and COV2-2130  
647   heavy or light chain in yellow or salmon, respectively. The RBD is colored in green. Interface  
648   residues are shown in stick representation.

649

650 **Extended Data Fig. 6. Identification of putative public clonotype members genetically**  
651 **similar to COV2-2196 in the antibody variable gene repertoires of virus-naïve individuals.**

652 Antibody variable gene sequences from healthy individuals with the same sequence features as  
653 COV2-2196 heavy chain and light chain are aligned. Sequences from three different donors as  
654 well as cord blood included sequences with the features of the public clonotype. The sequence  
655 features and contact residues used in COV2-2196 are highlighted in red boxes below each  
656 multiple sequence alignment.

657

658 **Extended Data Fig. 7. Identification by deep mutational scanning of mutations affecting**  
659 **antibody binding and method of selection of antibody resistant mutants with VSV-SARS-**  
660 **CoV-2 virus.**

661 **a.** Top: Flow cytometry plots showing representative gating strategy for selection of single  
662 yeast cells using forward- and side-scatter (first three panels) and selection of yeast cells  
663 expressing RBD (right panel). Each plot is derived from the preceding gate. Bottom:  
664 Flow cytometry plots showing gating for RBD<sup>+</sup>, antibody<sup>-</sup> yeast cells (*i.e.*, cells that  
665 express RBD but where a mutation prevents antibody binding). Selection experiments are  
666 shown for COV2-2196 or COV2-2130, with two independent libraries shown for each.

667 **b.** Correlation of observed sites of escape from antibody binding between yeast library  
668 selection experiments using COV2-2196, COV2-2130, or a 1:1 mixture of COV2-2196  
669 and COV2-2130. The x-axes show cumulative escape fraction for each site for library 1,  
670 and the y-axes show cumulative escape fraction for each site for library 2. Correlation  
671 coefficient and  $n$  are denoted for each graph.

672 **c.** Correlation of observed mutations that escape antibody binding between yeast library  
673 selection experiments using COV2-2196, COV2-2130, or a 1:1 mixture of COV2-2196  
674 and COV2-2130. The x-axes show each amino acid mutation's escape fraction for library  
675 1, and the y-axes show each amino acid mutation's escape fraction for library 2.  
676 Correlation coefficient and  $n$  are denoted for each graph.

677 **d-f.** DMS results for COV2-2196 (**d**), COV2-2130 (**e**), or a 1:1 mixture of COV2-2196 and  
678 COV2 2130 (**f**). Left panels: sites of escape across the entire RBD are indicated by peaks that  
679 correspond to the logo plots in the middle and right panel. Middle panel: as in **Fig. 4a**, logo  
680 plot of cumulative escape mutation fractions of all RBD sites with strong escape mutations  
681 for COV2-2196, or COV2-2130, or COV2-2196+COV2-2130. Mutations are colored based  
682 on the degree to which they abrogate RBD binding to human ACE2. Right panel: again, logo  
683 plots show cumulative escape fractions, but colored based on the degree to which mutations  
684 effect RBD expression in the yeast display system. Interactive, zoomable versions of these  
685 logo plots are at [https://jbloomlab.github.io/SARS-CoV-2-RBD\\_MAP\\_AZ\\_Abs/](https://jbloomlab.github.io/SARS-CoV-2-RBD_MAP_AZ_Abs/).

686 **g.** Representative RTCA sensograms showing virus that escaped antibody neutralization.  
687 Cytopathic effect (CPE) was monitored kinetically in Vero E6 cells inoculated with virus in  
688 the presence of a saturating concentration (5  $\mu\text{g}/\text{mL}$ ) of antibody COV2-2130. Representative  
689 instances of escape (magenta) or lack of detectable escape (blue) are shown. Uninfected cells  
690 (green) or cells inoculated with virus without antibody (red) serve as controls. Magenta and  
691 blue curves represent a single representative well; the red and green controls are the mean of  
692 technical duplicates.

693 **h.** Representative RTCA sensograms validating that a variant virus selected by COV2-2130  
694 in (**g**) indeed escaped COV2-2130 (magenta) but was neutralized by COV2-2196 (light blue).



695        **i.** Example sensograms from individual wells of 96-well E-plate analysis for escape selection  
696        experimetnts with COV2-2196, COV2-2130, or a 1:1 mix of COV2-2196 and COV2-2130.  
697        Instances of escape from COV2-2130 are noted, while escape was not detected in the  
698        presence of COV2-2196 or COV2-2196+COV2-2130. Positive and negative controls are  
699        denoted on the first plate.

700

701        **Extended Data Fig. 8. Method of selection of antibody resistant mutants with authentic**  
702        **SARS-CoV-2 virus.** The method for assessing monoclonal antibody resistant spike protein  
703        variants is shown. SARS-CoV-2 was passaged serially in the presence of monoclonal antibodies  
704        at the increasing concentrations indicated in the figure or without antibody (no monoclonal  
705        antibody). Following passage at  $IC_{90}$  concentrations, samples were treated with  $10 \times IC_{90}$   
706        concentrations of monoclonal antibodies and any resultant resistant virus collected, and the  
707        genome was sequenced.

708 **Materials and Methods**

709

710 **Expression and purification of recombinant receptor binding domain (RBD) of SARS-**

711 **CoV-2 spike protein**

712 The DNA segments correspondent to the S protein RBD (residues 319 - 528) was sequence  
713 optimized for expression, synthesized, and cloned into the pTwist-CMV expression DNA  
714 plasmid downstream of the IL-2 signal peptide (MYRMQLLSCIALSLALVTNS) (Twist  
715 Bioscience). A three amino acid linker (GSG) and a His-tag were incorporated at the C-terminus  
716 of the expression constructs to facilitate protein purification. Expi293F cells were transfected  
717 transiently with the plasmid encoding RBD, and culture supernatants were harvested after 5  
718 days. RBD was purified from the supernatants by nickel affinity chromatography with HisTrap  
719 Excel columns (GE Healthcare Life Sciences). For protein production used in crystallization  
720 trials, 5  $\mu$ M kifunensine was included in the culture medium to produce RBD with high mannose  
721 glycans. The high mannose glycoproteins subsequently were treated with endoglycosidase F1  
722 (Millipore) to obtain homogeneously deglycosylated RBD.

723

724 **Expression and purification of recombinant COV2-2196 and COV2-2130 Fabs**

725 The DNA fragments corresponding to the COV2-2196 and COV2-2130 heavy chain variable  
726 domains with human IgG1 CH1 domain and light chain variable domains with human kappa  
727 chain constant domain were synthesized and cloned into the pTwist vector (Twist Bioscience).  
728 This vector includes the heavy chain of each Fab, followed by a GGGGS linker, a furin cleavage  
729 site, a T2A ribosomal cleavage site, and the light chain of each Fab. Expression of the heavy and  
730 light chain are driven by the same CMV promoter. COV2-2196 and COV2-2130 Fabs were  
731 expressed in ExpiCHO cells by transient transfection with the expression plasmid. The

732 recombinant Fab was purified from culture supernatant using an anti-CH1 CaptureSelect column  
733 (Thermo Fisher Scientific). For the RBD/COV2-2196 complex, the *wt* sequence of COV2-2196  
734 was used for expression. For the RBD/COV2-2196/COV2-2130 complex, a modified version of  
735 COV2-2196 Fab was used in which the first two amino acids of the variable region were mutated  
736 from QM to EV.

737

### 738 **Crystallization and structural determination of antibody-antigen complexes**

739 Purified COV2-2196 Fab was mixed with deglycosylated RBD in a molar ratio of 1:1.5, and the  
740 mixture was purified further by size-exclusion chromatography with a Superdex-200 Increase  
741 column (GE Healthcare Life Sciences) to obtain the antibody-antigen complex. To obtain  
742 RBD/COV2-2196/COV2-2130 triple complex, purified and deglycosylated RBD was mixed  
743 with both COV2-2196 and COV2-2130 Fabs in a molar ratio of 1:1.5:1.5, and the triple complex  
744 was purified with a Superdex-200 Increase column. The complexes were concentrated to about  
745 10 mg/mL and subjected to crystallization trials. The RBD/COV2-2196 complex was  
746 crystallized in 16% - 18% PEG 3350, 0.2 Tris-HCl pH 8.0 – 8.5, and the RBD/COV2-  
747 2196/COV2-2130 complex was crystallized in 5% (w/v) PEG 1000, 100 mM sodium phosphate  
748 dibasic/citric acid pH 4.2, 40% (v/v) reagent alcohol. Cryo-protection solution was made by  
749 mixing crystallization solution with 100% glycerol in a volume ratio of 20:7 for crystals of both  
750 complexes. Protein crystals were flash-frozen in liquid nitrogen after a quick soaking in the cryo-  
751 protection solution. Diffraction data were collected at the beamline 21-ID-F for RBD/COV2-  
752 2196 complex and 21-ID-G for RBD/COV2-2196/COV2-2130 complex at the Advanced Photon  
753 Source. The diffraction data were processed with XDS<sup>59</sup> and CCP4 suite<sup>60</sup>. The crystal structures  
754 were solved by molecular replacement using the structure of RBD in complex with Fab CC12.1

755 (PDB ID 6XC2) and Fab structure of MR78 (PDB ID 5JRP) with the program Phaser<sup>61</sup>. The  
756 structures were refined and rebuilt manually with Phenix<sup>62</sup> or Coot<sup>63</sup>, respectively. The models  
757 have been deposited into the Protein Data Bank. PyMOL software<sup>64</sup> was used to make all of the  
758 structural figures.

759

### 760 **COV2-2196 mutant generation**

761 Structurally-important residues in the COV2-2196 heavy chain sequence were identified as D108,  
762 P99, and the disulfide bond in HCDR3. The D108 residue was mutated to alanine, asparagine,  
763 and glutamic acid. The P99 residue was mutated to valine, asparagine, and glycine. The  
764 disulfide bond was removed by replacing the cystines with alanine. Additionally, the germline  
765 revertant forms of COV2-2196 were generated by aligning the sequence to identified germline  
766 sequences using IgBlast, and reverting back the residues that were not germline-encoded. DNA  
767 fragments corresponding to the COV2-2196 mutant heavy chain variable domains with human  
768 IgG1 and light chain variable domain with human kappa chain constant domain were synthesized  
769 and cloned into the pTwist\_mCis vector (Twist Bioscience) as previously described<sup>25</sup>. Constructs  
770 were transformed into *E. coli*, and DNA was purified. Antibodies then were produced by  
771 transient transfection of ExpiCHO cells following the manufacturer's protocol (Gibco).  
772 Supernatants were filter-sterilized using 0.45 µm pore size filters and samples were applied to  
773 HiTrap MabSelect Sure columns (Cytiva).

774

### 775 **ELISA binding of COV2-2196 mutants**

776 Wells of 384-well microtiter plates were coated with purified recombinant SARS-CoV-2 S 6P  
777 protein at 4°C overnight. Plates were blocked with 2% non-fat dry milk and 2% normal goat

778 serum in DPBS containing 0.05% Tween-20 (DPBS-T) for 1 h. Antibodies were diluted to 10  
779  $\mu\text{g/mL}$  and titrated two-fold 23 times in DPBS-T and added to the wells, followed by an  
780 incubation for 1 h at room temperature. The bound antibodies were detected using goat anti-  
781 human IgG conjugated with horseradish peroxidase (Southern Biotech) and TMB substrate  
782 (Thermo Fischer Scientific). Reactions were quenched with 1 N hydrochloric acid and  
783 absorbance was measured at 450 nm using a spectrophotometer (Biotek).

784

### 785 **Mapping of all mutations that escape antibody binding**

786

787 All mutations that escape antibody binding were mapped via a DMS approach<sup>27</sup>. We used  
788 previously described yeast-display RBD mutant libraries<sup>27,28</sup>. Briefly, duplicate mutant libraries  
789 were constructed in the spike receptor binding domain (RBD) from SARS-CoV-2 (isolate  
790 Wuhan-Hu-1, Genbank accession number MN908947, residues N331-T531) and contain 3,804  
791 of the 3,819 possible amino-acid mutations, with >95% present as single mutants. Each RBD  
792 variant was linked to a unique 16-nucleotide barcode sequence to facilitate downstream  
793 sequencing. As previously described, libraries were sorted for RBD expression and ACE2  
794 binding to eliminate RBD variants that are completely misfolded or non-functional (*i.e.*, lacking  
795 modest ACE2 binding affinity<sup>27</sup>).

796

797 Antibody escape mapping experiments were performed in biological duplicate using two  
798 independent mutant RBD libraries, as previously described<sup>27</sup>, with minor modifications. Briefly,  
799 mutant yeast libraries induced to express RBD were washed and incubated with antibody at 400  
800  $\text{ng/mL}$  for 1 h at room temperature with gentle agitation. After the antibody incubations, the  
801 libraries were secondarily labeled with 1:100 FITC-conjugated anti-MYC antibody  
802 (Immunology Consultants Lab, CYMC-45F) to label for RBD expression and 1:200 PE-

803 conjugated goat anti-human-IgG (Jackson ImmunoResearch 109-115-098) to label for bound  
804 antibody. Flow cytometric sorting was used to enrich for cells expressing RBD variants with  
805 reduced antibody binding via a selection gate drawn to capture unmutated SARS-CoV-2 cells  
806 labeled at 1% the antibody concentration of the library samples. For each sample, approximately  
807 10 million RBD+ cells were processed on the cytometer. Antibody-escaped cells were grown  
808 overnight in SD-CAA (6.7 g/L Yeast Nitrogen Base, 5.0 g/L Casamino acids, 1.065 g/L MES  
809 acid, and 2% w/v dextrose) to expand cells prior to plasmid extraction.

810  
811 Plasmid samples were prepared from pre-selection and overnight cultures of antibody-escaped  
812 cells (Zymoprep Yeast Plasmid Miniprep II) as previously described<sup>27</sup>. The 16-nucleotide  
813 barcode sequences identifying each RBD variant were amplified by PCR and sequenced on an  
814 Illumina HiSeq 2500 with 50 bp single-end reads as described<sup>27,28</sup>.

815  
816 Escape fractions were computed as described<sup>27</sup>, with minor modifications as noted below. We  
817 used the `dms_variants` package ([https://jbloomlab.github.io/dms\\_variants/](https://jbloomlab.github.io/dms_variants/), version 0.8.2) to  
818 process Illumina sequences into counts of each barcoded RBD variant in each pre-sort and  
819 antibody-escape population using the barcode/RBD look-up table previously described<sup>65</sup>.

820  
821 For each antibody selection, we computed the “escape fraction” for each barcoded variant using  
822 the deep sequencing counts for each variant in the original and antibody-escape populations and  
823 the total fraction of the library that escaped antibody binding via a previously described  
824 formula<sup>27</sup>. These escape fractions represent the estimated fraction of cells expressing that  
825 specific variant that fall in the antibody escape bin, such that a value of 0 means the variant is

826 always bound by serum and a value of 1 means that it always escapes antibody binding. We then  
827 applied a computational filter to remove variants with low sequencing counts or highly  
828 deleterious mutations that might cause antibody escape simply by leading to poor expression of  
829 properly folded RBD on the yeast cell surface<sup>27,28</sup>. Specifically, we removed variants that had (or  
830 contained mutations with) ACE2 binding scores  $< -2.35$  or expression scores  $< -1$ , using the  
831 variant- and mutation-level deep mutational scanning scores as previously described<sup>28</sup>. Note that  
832 these filtering criteria are slightly more stringent than those previously used to map a panel of  
833 human antibodies<sup>27</sup> but are identical to those used in recent studies defining RBD residues that  
834 impact the binding of mAbs<sup>65</sup> and polyclonal serum<sup>40</sup>.

835

836 We next deconvolved variant-level escape scores into escape fraction estimates for single  
837 mutations using global epistasis models<sup>66</sup> implemented in the `dms_variants` package, as detailed  
838 at ([https://jbloomlab.github.io/dms\\_variants/dms\\_variants\\_globalepistasis.html](https://jbloomlab.github.io/dms_variants/dms_variants_globalepistasis.html)) and described<sup>27</sup>.

839 The reported escape fractions throughout the paper are the average across the libraries  
840 (correlations shown in **Extended Data Fig. 7a,b**); these scores are also in **Supplementary Data**  
841 **Table 1**. Sites of strong escape from each antibody for highlighting in logo plots were  
842 determined heuristically as sites whose summed mutational escape scores were at least 10 times  
843 the median sitewise sum of selection, and within 10-fold of the sitewise sum of the most strongly  
844 selected site. Full documentation of the computational analysis is at  
845 [https://github.com/jbloomlab/SARS-CoV-2-RBD\\_MAP\\_AZ\\_Abs](https://github.com/jbloomlab/SARS-CoV-2-RBD_MAP_AZ_Abs). These results are also  
846 available in an interactive form at [https://jbloomlab.github.io/SARS-CoV-2-](https://jbloomlab.github.io/SARS-CoV-2-RBD_MAP_AZ_Abs/)  
847 [RBD\\_MAP\\_AZ\\_Abs/](https://jbloomlab.github.io/SARS-CoV-2-RBD_MAP_AZ_Abs/).

848

849 **Antibody escape selection experiments with VSV-SARS-CoV-2.** For escape selection  
850 experiments with COV2-2196 and COV2-2130, we used a replication competent recombinant  
851 VSV virus encoding the spike protein from SARS-CoV-2 with a 21 amino-acid C-terminal  
852 deletion<sup>29</sup>. The spike-expressing VSV virus was propagated in MA104 cells (African green  
853 monkey, ATCC CRL-2378.1) as described previously<sup>29</sup>, and viral stocks were titrated on Vero  
854 E6 cell monolayer cultures. Plaques were visualized using neutral red staining. To screen for  
855 escape mutations selected in the presence of COV2-2196, COV2-2130, or a cocktail composed  
856 of a 1:1 mixture of COV2-2196 and COV2-2130, we used a real-time cell analysis assay  
857 (RTCA) and xCELLigence RTCA MP Analyzer (ACEA Biosciences Inc.) and a previously  
858 described escape selection scheme<sup>27</sup>. Briefly, 50  $\mu$ L of cell culture medium (DMEM  
859 supplemented with 2% FBS) was added to each well of a 96-well E-plate to obtain a background  
860 reading. Eighteen thousand (18,000) Vero E6 cells in 50  $\mu$ L of cell culture medium were seeded  
861 per well, and plates were placed on the analyzer. Measurements were taken automatically every  
862 15 min and the sensograms were visualized using RTCA software version 2.1.0 (ACEA  
863 Biosciences Inc). VSV-SARS-CoV-2 virus (5,000 plaque forming units [PFU] per well,  $\sim$ 0.3  
864 MOI) was mixed with a saturating neutralizing concentration of COV2-2196, COV2-2130, or a  
865 1:1 mixture of COV2-2196 and COV2-2130 antibody (5  $\mu$ g/mL total concentration of  
866 antibodies) in a total volume of 100  $\mu$ L and incubated for 1 h at 37°C. At 16-20 h after seeding  
867 the cells, the virus-antibody mixtures were added to cell monolayers. Wells containing only virus  
868 in the absence of antibody and wells containing only Vero E6 cells in medium were included on  
869 each plate as controls. Plates were measured continuously (every 15 min) for 72 h. Escape  
870 mutations were identified by monitoring the cell index for a drop in cellular viability. To verify  
871 escape from antibody selection, wells where cytopathic effect was observed in the presence of



872 COV2-2130 were assessed in a subsequent RTCA experiment in the presence of 10 µg/mL of  
873 COV2-2130 or COV2-2196. After confirmation of resistance of selected viruses to neutralization  
874 by COV2-2130, viral isolates were expanded on Vero E6 cells in the presence of 10 µg/mL of  
875 COV2-2130. Viral RNA was isolated using a QiAmp Viral RNA extraction kit (QIAGEN)  
876 according to manufacturer protocol, and the SARS-CoV-2 spike gene was reverse-transcribed  
877 and amplified with a SuperScript IV One-Step RT-PCR kit (ThermoFisher Scientific) using  
878 primers flanking the S gene. The amplified PCR product was purified using SPRI magnetic  
879 beads (Beckman Coulter) at a 1:1 ratio and sequenced by the Sanger method, using primers  
880 giving forward and reverse reads of the RBD.

881

882 **Serial passaging and testing of SARS-CoV-2 to select for mAb resistant mutations.** SARS-  
883 CoV-2 strain USA-WA1/2020 was passaged serially in Vero cell monolayer cultures with  
884 AZD8895, AZD1061 or AZD7442, at concentrations beginning at their respective IC<sub>50</sub> values  
885 and increased step-wise to their IC<sub>90</sub> value with each passage. As a control, virus was passaged in  
886 the absence of antibody. Following the final passage, viruses were evaluated for susceptibility  
887 against the reciprocal antibody at a final concentration of 10 times the IC<sub>90</sub> concentration by  
888 plaque assay. Plaques (n=6) were selected randomly for AZD1061 cultures, and their virus  
889 spike-encoding gene was sequenced.

890

891 **Generation of authentic SARS-CoV-2 viruses, including viruses with variant residues.** The  
892 2019n-CoV/USA\_WA1/2020 isolate of SARS-CoV-2 was obtained from the US Centers for  
893 Disease Control (CDC) and passaged on Vero E6 cells. Individual point mutations in the spike  
894 gene (D614G and E484K/D614G) were introduced into an infectious cDNA clone of the 2019n-

895 CoV/USA\_WA1/2020 strain as described previously<sup>67</sup>. Nucleotide substitutions were introduced  
896 into a subclone puc57-CoV-2-F6 containing the spike gene of the SARS-CoV-2 wild-type  
897 infectious clone<sup>68</sup>. The full-length infectious cDNA clones of the variant SARS-CoV-2 viruses  
898 were assembled by *in vitro* ligation of seven contiguous cDNA fragments following the  
899 previously described protocol<sup>68</sup>. *In vitro* transcription then was performed to synthesize full-  
900 length genomic RNA. To recover the mutant viruses, the RNA transcripts were electroporated  
901 into Vero E6 cells. The viruses from the supernatant of cells were collected 40 h later and served  
902 as p0 stocks. All virus stocks were confirmed by sequencing.

903

904 **Focus reduction neutralization test.** Serial dilutions of mAbs or serum were incubated with 10<sup>2</sup>  
905 focus-forming units (FFU) of different strains or variants of SARS-CoV-2 for 1 h at 37°C.  
906 Antibody-virus complexes were added to Vero-hACE2-TMPRSS2 cell monolayer cultures in 96-  
907 well plates and incubated at 37°C for 1 h. Subsequently, cells were overlaid with 1% (w/v)  
908 methylcellulose in MEM supplemented with 2% FBS. Plates were harvested 20 h later by  
909 removing overlays and fixed with 4% PFA in PBS for 20 min at room temperature. Plates were  
910 washed and sequentially incubated with an oligoclonal pool of anti-S mAbs and HRP-conjugated  
911 goat anti-human IgG in PBS supplemented with 0.1% saponin and 0.1% bovine serum albumin.  
912 SARS-CoV-2-infected cell foci were visualized using TrueBlue peroxidase substrate (KPL) and  
913 quantitated on an ImmunoSpot microanalyzer (Cellular Technologies).

914

#### 915 **Multiple sequence alignments**

916 We searched for antibody variable gene sequences originating with the same features as those  
917 encoding COV2-2196 and retrieved the matching sequences from the repertoires of each

918 individual examined. We searched for similar sequences in the publicly available large-scale  
919 antibody sequence repertoires for three healthy individuals and cord blood repertoires (deposited  
920 at SRP174305). The search parameters for the heavy chain were sequences with *IGHV1-58* and  
921 *IGHJ3* with the P99, D108, and F110 residues. Additionally, the search parameters for the light  
922 chain were sequences with Y92 and W98 residues. Sequences from a matching clonotype that  
923 belonged to each individual were aligned with either ClustalO<sup>69</sup> (heavy chains) or with  
924 MUSCLE<sup>70</sup> (light chains). Then, LOGOs plots of aligned sequences were generated using  
925 WebLogo<sup>71</sup>.

926 **References**

- 927 1 Zost, S. J. *et al.* Potently neutralizing and protective human antibodies against SARS-  
928 CoV-2. *Nature* **584**, 443-449, doi:10.1038/s41586-020-2548-6 (2020).
- 929 2 Robbiani, D. F. *et al.* Convergent antibody responses to SARS-CoV-2 in convalescent  
930 individuals. *Nature* **584**, 437-442, doi:10.1038/s41586-020-2456-9 (2020).
- 931 3 Kreer, C. *et al.* Longitudinal Isolation of Potent Near-Germline SARS-CoV-2-  
932 Neutralizing Antibodies from COVID-19 Patients. *Cell* **182**, 843-854 e812,  
933 doi:10.1016/j.cell.2020.06.044 (2020).
- 934 4 Tortorici, M. A. *et al.* Ultrapotent human antibodies protect against SARS-CoV-2  
935 challenge via multiple mechanisms. *Science*, doi:10.1126/science.abe3354 (2020).
- 936 5 Zhou, P. *et al.* A pneumonia outbreak associated with a new coronavirus of probable bat  
937 origin. *Nature* **579**, 270-273, doi:10.1038/s41586-020-2012-7 (2020).
- 938 6 Zhu, N. *et al.* A Novel Coronavirus from Patients with Pneumonia in China, 2019. *N*  
939 *Engl J Med* **382**, 727-733, doi:10.1056/NEJMoa2001017 (2020).
- 940 7 Hoffmann, M. *et al.* SARS-CoV-2 Cell Entry Depends on ACE2 and TMPRSS2 and Is  
941 Blocked by a Clinically Proven Protease Inhibitor. *Cell* **181**, 271-280 e278,  
942 doi:10.1016/j.cell.2020.02.052 (2020).
- 943 8 Letko, M., Marzi, A. & Munster, V. Functional assessment of cell entry and receptor  
944 usage for SARS-CoV-2 and other lineage B betacoronaviruses. *Nat Microbiol* **5**, 562-  
945 569, doi:10.1038/s41564-020-0688-y (2020).
- 946 9 Wahba, L. *et al.* An Extensive Meta-Metagenomic Search Identifies SARS-CoV-2-  
947 Homologous Sequences in Pangolin Lung Viromes. *mSphere* **5**,  
948 doi:10.1128/mSphere.00160-20 (2020).

- 949 10 Walls, A. C. *et al.* Tectonic conformational changes of a coronavirus spike glycoprotein  
950 promote membrane fusion. *Proc Natl Acad Sci U S A* **114**, 11157-11162,  
951 doi:10.1073/pnas.1708727114 (2017).
- 952 11 Algaissi, A. *et al.* SARS-CoV-2 S1 and N-based serological assays reveal rapid  
953 seroconversion and induction of specific antibody response in COVID-19 patients. *Sci*  
954 *Rep* **10**, 16561, doi:10.1038/s41598-020-73491-5 (2020).
- 955 12 Long, Q. X. *et al.* Antibody responses to SARS-CoV-2 in patients with COVID-19. *Nat*  
956 *Med* **26**, 845-848, doi:10.1038/s41591-020-0897-1 (2020).
- 957 13 Piccoli, L. *et al.* Mapping Neutralizing and Immunodominant Sites on the SARS-CoV-2  
958 Spike Receptor-Binding Domain by Structure-Guided High-Resolution Serology. *Cell*,  
959 doi:10.1016/j.cell.2020.09.037 (2020).
- 960 14 Brouwer, P. J. M. *et al.* Potent neutralizing antibodies from COVID-19 patients define  
961 multiple targets of vulnerability. *Science* **369**, 643-650, doi:10.1126/science.abc5902  
962 (2020).
- 963 15 Cao, Y. *et al.* Potent Neutralizing Antibodies against SARS-CoV-2 Identified by High-  
964 Throughput Single-Cell Sequencing of Convalescent Patients' B Cells. *Cell* **182**, 73-84  
965 e16, doi:10.1016/j.cell.2020.05.025 (2020).
- 966 16 Hansen, J. *et al.* Studies in humanized mice and convalescent humans yield a SARS-  
967 CoV-2 antibody cocktail. *Science* **369**, 1010-1014, doi:10.1126/science.abd0827 (2020).
- 968 17 Ju, B. *et al.* Human neutralizing antibodies elicited by SARS-CoV-2 infection. *Nature*  
969 **584**, 115-119, doi:10.1038/s41586-020-2380-z (2020).
- 970 18 Liu, L. *et al.* Potent neutralizing antibodies against multiple epitopes on SARS-CoV-2  
971 spike. *Nature* **584**, 450-456, doi:10.1038/s41586-020-2571-7 (2020).

- 972 19 Rogers, T. F. *et al.* Isolation of potent SARS-CoV-2 neutralizing antibodies and  
973 protection from disease in a small animal model. *Science* **369**, 956-963,  
974 doi:10.1126/science.abc7520 (2020).
- 975 20 Shi, R. *et al.* A human neutralizing antibody targets the receptor-binding site of SARS-  
976 CoV-2. *Nature* **584**, 120-124, doi:10.1038/s41586-020-2381-y (2020).
- 977 21 Weitkamp, J. H. *et al.* Infant and adult human B cell responses to rotavirus share  
978 common immunodominant variable gene repertoires. *J Immunol* **171**, 4680-4688,  
979 doi:10.4049/jimmunol.171.9.4680 (2003).
- 980 22 Benton, D. J. *et al.* Receptor binding and priming of the spike protein of SARS-CoV-2  
981 for membrane fusion. *Nature*, doi:10.1038/s41586-020-2772-0 (2020).
- 982 23 Wrapp, D. *et al.* Cryo-EM structure of the 2019-nCoV spike in the prefusion  
983 conformation. *Science* **367**, 1260-1263, doi:10.1126/science.abb2507 (2020).
- 984 24 Wrobel, A. G. *et al.* SARS-CoV-2 and bat RaTG13 spike glycoprotein structures inform  
985 on virus evolution and furin-cleavage effects. *Nat Struct Mol Biol* **27**, 763-767,  
986 doi:10.1038/s41594-020-0468-7 (2020).
- 987 25 Zost, S. J. *et al.* Rapid isolation and profiling of a diverse panel of human monoclonal  
988 antibodies targeting the SARS-CoV-2 spike protein. *Nat Med* **26**, 1422-1427,  
989 doi:10.1038/s41591-020-0998-x (2020).
- 990 26 Soto, C. *et al.* High frequency of shared clonotypes in human B cell receptor repertoires.  
991 *Nature* **566**, 398-402, doi:10.1038/s41586-019-0934-8 (2019).
- 992 27 Greaney, A. J. *et al.* Complete mapping of mutations to the SARS-CoV-2 spike receptor-  
993 binding domain that escape antibody recognition. *Cell Host Microbe*,  
994 doi:10.1016/j.chom.2020.11.007 (2020).

- 995 28 Starr, T. N. *et al.* Deep mutational scanning of SARS-CoV-2 receptor binding domain  
996 reveals constraints on folding and ACE2 binding. *Cell* **182**, 1295-1310 e1220,  
997 doi:10.1016/j.cell.2020.08.012 (2020).
- 998 29 Case, J. B. *et al.* Neutralizing antibody and soluble ACE2 inhibition of a replication-  
999 competent VSV-SARS-CoV-2 and a clinical isolate of SARS-CoV-2. *Cell Host Microbe*  
1000 **28**, 475-485 e475, doi:10.1016/j.chom.2020.06.021 (2020).
- 1001 30 Klimstra, W. B. *et al.* SARS-CoV-2 growth, furin-cleavage-site adaptation and  
1002 neutralization using serum from acutely infected hospitalized COVID-19 patients. *J Gen*  
1003 *Virol* **101**, 1156-1169, doi:10.1099/jgv.0.001481 (2020).
- 1004 31 Sawatzki, K. *et al.* Ferrets not infected by SARS-CoV-2 in a high-exposure domestic  
1005 setting. *bioRxiv*, 2020.2008.2021.254995, doi:10.1101/2020.08.21.254995 (2020).
- 1006 32 Baum, A. *et al.* REGN-COV2 antibodies prevent and treat SARS-CoV-2 infection in  
1007 rhesus macaques and hamsters. *Science* **370**, 1110-1115, doi:10.1126/science.abe2402  
1008 (2020).
- 1009 33 Li, Q. *et al.* The impact of mutations in SARS-CoV-2 spike on viral infectivity and  
1010 antigenicity. *Cell* **182**, 1284-1294 e1289, doi:10.1016/j.cell.2020.07.012 (2020).
- 1011 34 Galloway, S. E. *et al.* Emergence of SARS-CoV-2 B.1.1.7 Lineage - United States,  
1012 December 29, 2020-January 12, 2021. *MMWR Morb Mortal Wkly Rep* **70**, 95-99,  
1013 doi:10.15585/mmwr.mm7003e2 (2021).
- 1014 35 Leung, K., Shum, M. H., Leung, G. M., Lam, T. T. & Wu, J. T. Early transmissibility  
1015 assessment of the N501Y mutant strains of SARS-CoV-2 in the United Kingdom,  
1016 October to November 2020. *Euro Surveill* **26**, doi:10.2807/1560-  
1017 7917.ES.2020.26.1.2002106 (2021).

- 1018 36 Tegally, H. *et al.* Emergence and rapid spread of a new severe acute respiratory  
1019 syndrome-related coronavirus 2 (SARS-CoV-2) lineage with multiple spike mutations in  
1020 South Africa. *medRxiv*, 2020.2012.2021.20248640, doi:10.1101/2020.12.21.20248640  
1021 (2020).
- 1022 37 Voloch, C. M. *et al.* Genomic characterization of a novel SARS-CoV-2 lineage from Rio  
1023 de Janeiro, Brazil. *medRxiv*, 2020.2012.2023.20248598,  
1024 doi:10.1101/2020.12.23.20248598 (2020).
- 1025 38 Liu, Z. *et al.* Landscape analysis of escape variants identifies SARS-CoV-2 spike  
1026 mutations that attenuate monoclonal and serum antibody neutralization. *bioRxiv*,  
1027 2020.2011.2006.372037, doi:10.1101/2020.11.06.372037 (2021).
- 1028 39 Weisblum, Y. *et al.* Escape from neutralizing antibodies by SARS-CoV-2 spike protein  
1029 variants. *Elife* **9**, doi:10.7554/eLife.61312 (2020).
- 1030 40 Greaney, A. J. *et al.* Comprehensive mapping of mutations to the SARS-CoV-2 receptor-  
1031 binding domain that affect recognition by polyclonal human serum antibodies. *bioRxiv*,  
1032 2020.2012.2031.425021, doi:10.1101/2020.12.31.425021 (2021).
- 1033 41 Wibmer, C. K. *et al.* SARS-CoV-2 501Y.V2 escapes neutralization by South African  
1034 COVID-19 donor plasma. *bioRxiv*, 2021.2001.2018.427166,  
1035 doi:10.1101/2021.01.18.427166 (2021).
- 1036 42 Andreano, E. *et al.* SARS-CoV-2 escape *in vitro* from a highly neutralizing COVID-19  
1037 convalescent plasma. *bioRxiv*, 2020.2012.2028.424451, doi:10.1101/2020.12.28.424451  
1038 (2020).



- 1039 43 Cele, S. *et al.* Escape of SARS-CoV-2 501Y.V2 variants from neutralization by  
1040 convalescent plasma. *medRxiv*, 2021.2001.2026.21250224,  
1041 doi:10.1101/2021.01.26.21250224 (2021).
- 1042 44 Tian, C. *et al.* Immunodominance of the VH1-46 antibody gene segment in the primary  
1043 repertoire of human rotavirus-specific B cells is reduced in the memory compartment  
1044 through somatic mutation of nondominant clones. *J Immunol* **180**, 3279-3288,  
1045 doi:10.4049/jimmunol.180.5.3279 (2008).
- 1046 45 Wu, X. *et al.* Focused evolution of HIV-1 neutralizing antibodies revealed by structures  
1047 and deep sequencing. *Science* **333**, 1593-1602, doi:10.1126/science.1207532 (2011).
- 1048 46 Zhou, T. *et al.* Structural Repertoire of HIV-1-Neutralizing Antibodies Targeting the  
1049 CD4 Supersite in 14 Donors. *Cell* **161**, 1280-1292, doi:10.1016/j.cell.2015.05.007  
1050 (2015).
- 1051 47 Huang, C. C. *et al.* Structural basis of tyrosine sulfation and VH-gene usage in antibodies  
1052 that recognize the HIV type 1 coreceptor-binding site on gp120. *Proc Natl Acad Sci U S*  
1053 *A* **101**, 2706-2711, doi:10.1073/pnas.0308527100 (2004).
- 1054 48 Williams, W. B. *et al.* HIV-1 VACCINES. Diversion of HIV-1 vaccine-induced  
1055 immunity by gp41-microbiota cross-reactive antibodies. *Science* **349**, aab1253,  
1056 doi:10.1126/science.aab1253 (2015).
- 1057 49 Joyce, M. G. *et al.* Vaccine-Induced Antibodies that Neutralize Group 1 and Group 2  
1058 Influenza A Viruses. *Cell* **166**, 609-623, doi:10.1016/j.cell.2016.06.043 (2016).
- 1059 50 Pappas, L. *et al.* Rapid development of broadly influenza neutralizing antibodies through  
1060 redundant mutations. *Nature* **516**, 418-422, doi:10.1038/nature13764 (2014).

- 1061 51 Sui, J. *et al.* Structural and functional bases for broad-spectrum neutralization of avian  
1062 and human influenza A viruses. *Nat Struct Mol Biol* **16**, 265-273, doi:10.1038/nsmb.1566  
1063 (2009).
- 1064 52 Wheatley, A. K. *et al.* H5N1 Vaccine-Elicited Memory B Cells Are Genetically  
1065 Constrained by the IGHV Locus in the Recognition of a Neutralizing Epitope in the  
1066 Hemagglutinin Stem. *J Immunol* **195**, 602-610, doi:10.4049/jimmunol.1402835 (2015).
- 1067 53 Bailey, J. R. *et al.* Broadly neutralizing antibodies with few somatic mutations and  
1068 hepatitis C virus clearance. *JCI Insight* **2**, doi:10.1172/jci.insight.92872 (2017).
- 1069 54 Giang, E. *et al.* Human broadly neutralizing antibodies to the envelope glycoprotein  
1070 complex of hepatitis C virus. *Proc Natl Acad Sci U S A* **109**, 6205-6210,  
1071 doi:10.1073/pnas.1114927109 (2012).
- 1072 55 Yuan, M. *et al.* Structural basis of a shared antibody response to SARS-CoV-2. *Science*  
1073 **369**, 1119-1123, doi:10.1126/science.abd2321 (2020).
- 1074 56 Nielsen, S. C. A. *et al.* Human B Cell Clonal Expansion and Convergent Antibody  
1075 Responses to SARS-CoV-2. *Cell Host Microbe* **28**, 516-525 e515,  
1076 doi:10.1016/j.chom.2020.09.002 (2020).
- 1077 57 Rappuoli, R., Bottomley, M. J., D'Oro, U., Finco, O. & De Gregorio, E. Reverse  
1078 vaccinology 2.0: Human immunology instructs vaccine antigen design. *J Exp Med* **213**,  
1079 469-481, doi:10.1084/jem.20151960 (2016).
- 1080 58 Wang, P. *et al.* Increased Resistance of SARS-CoV-2 Variants B.1.351 and B.1.1.7 to  
1081 Antibody Neutralization. *bioRxiv*, 2021.2001.2025.428137,  
1082 doi:10.1101/2021.01.25.428137 (2021).

- 1083 59 Kabsch, W. Xds. *Acta Crystallogr D Biol Crystallogr* **66**, 125-132,  
1084 doi:10.1107/S0907444909047337 (2010).
- 1085 60 Winn, M. D. *et al.* Overview of the CCP4 suite and current developments. *Acta*  
1086 *Crystallogr D Biol Crystallogr* **67**, 235-242, doi:10.1107/S0907444910045749 (2011).
- 1087 61 McCoy, A. J. *et al.* Phaser crystallographic software. *J Appl Crystallogr* **40**, 658-674,  
1088 doi:10.1107/S0021889807021206 (2007).
- 1089 62 Adams, P. D. *et al.* PHENIX: a comprehensive Python-based system for macromolecular  
1090 structure solution. *Acta Crystallogr D Biol Crystallogr* **66**, 213-221,  
1091 doi:10.1107/S0907444909052925 (2010).
- 1092 63 Emsley, P. & Cowtan, K. Coot: model-building tools for molecular graphics. *Acta*  
1093 *Crystallogr D Biol Crystallogr* **60**, 2126-2132, doi:10.1107/S0907444904019158 (2004).
- 1094 64 Schrodinger, LLC. *The PyMOL Molecular Graphics System, Version 1.8* (2015).
- 1095 65 Starr, T. N. *et al.* Prospective mapping of viral mutations that escape antibodies used to  
1096 treat COVID-19. *bioRxiv*, doi:10.1101/2020.11.30.405472 (2020).
- 1097 66 Otwinowski, J., McCandlish, D. M. & Plotkin, J. B. Inferring the shape of global  
1098 epistasis. *Proc Natl Acad Sci U S A* **115**, E7550-E7558, doi:10.1073/pnas.1804015115  
1099 (2018).
- 1100 67 Plante, J. A. *et al.* Spike mutation D614G alters SARS-CoV-2 fitness. *Nature*,  
1101 doi:10.1038/s41586-020-2895-3 (2020).
- 1102 68 Xie, X. *et al.* An infectious cDNA clone of SARS-CoV-2. *Cell Host Microbe* **27**, 841-  
1103 848 e843, doi:10.1016/j.chom.2020.04.004 (2020).
- 1104 69 Sievers, F. *et al.* Fast, scalable generation of high-quality protein multiple sequence  
1105 alignments using Clustal Omega. *Mol Syst Biol* **7**, 539, doi:10.1038/msb.2011.75 (2011).

1106 70 Edgar, R. C. MUSCLE: a multiple sequence alignment method with reduced time and  
1107 space complexity. *BMC Bioinformatics* **5**, 113, doi:10.1186/1471-2105-5-113 (2004).  
1108 71 Crooks, G. E., Hon, G., Chandonia, J. M. & Brenner, S. E. WebLogo: a sequence logo  
1109 generator. *Genome Res* **14**, 1188-1190, doi:10.1101/gr.849004 (2004).  
1110

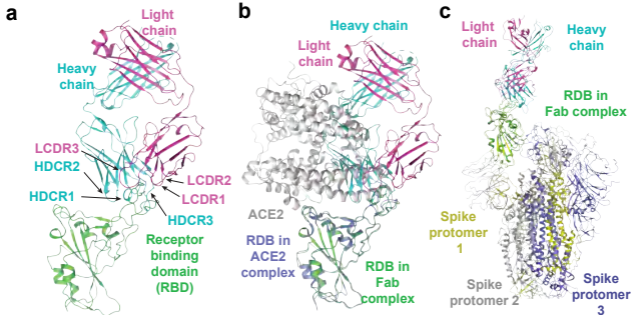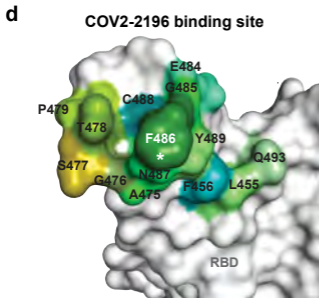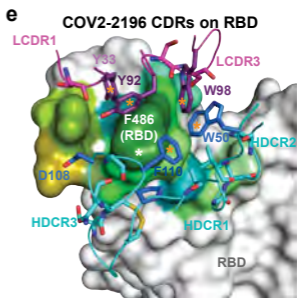

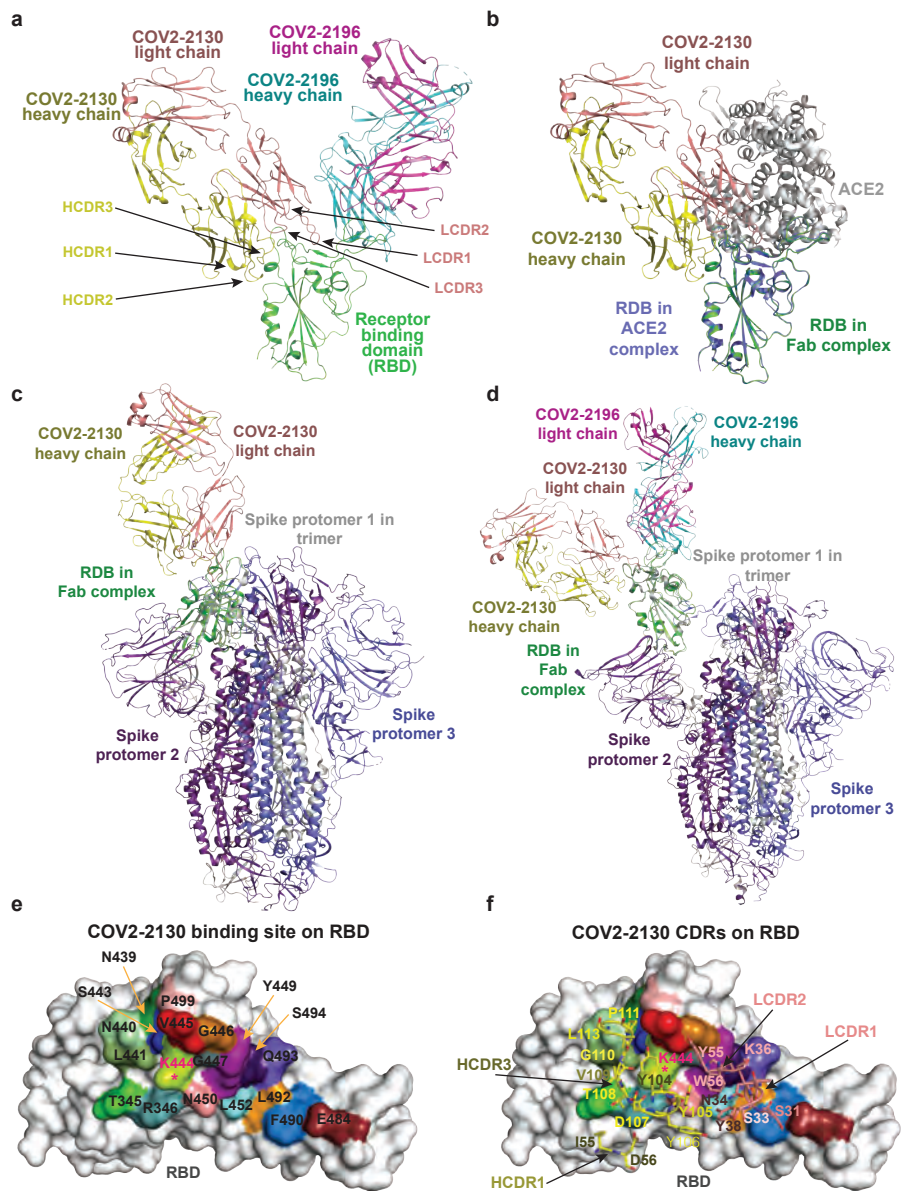

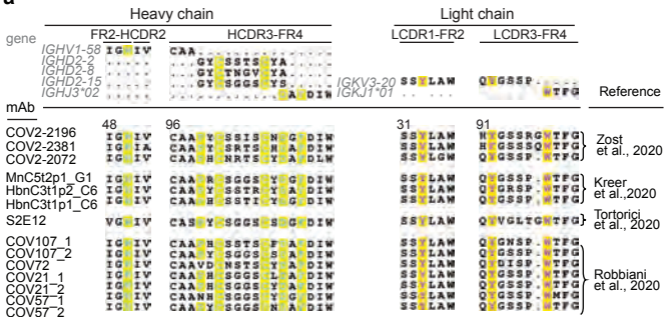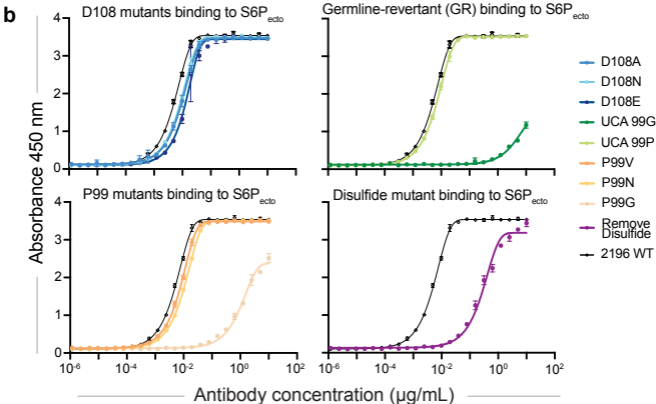

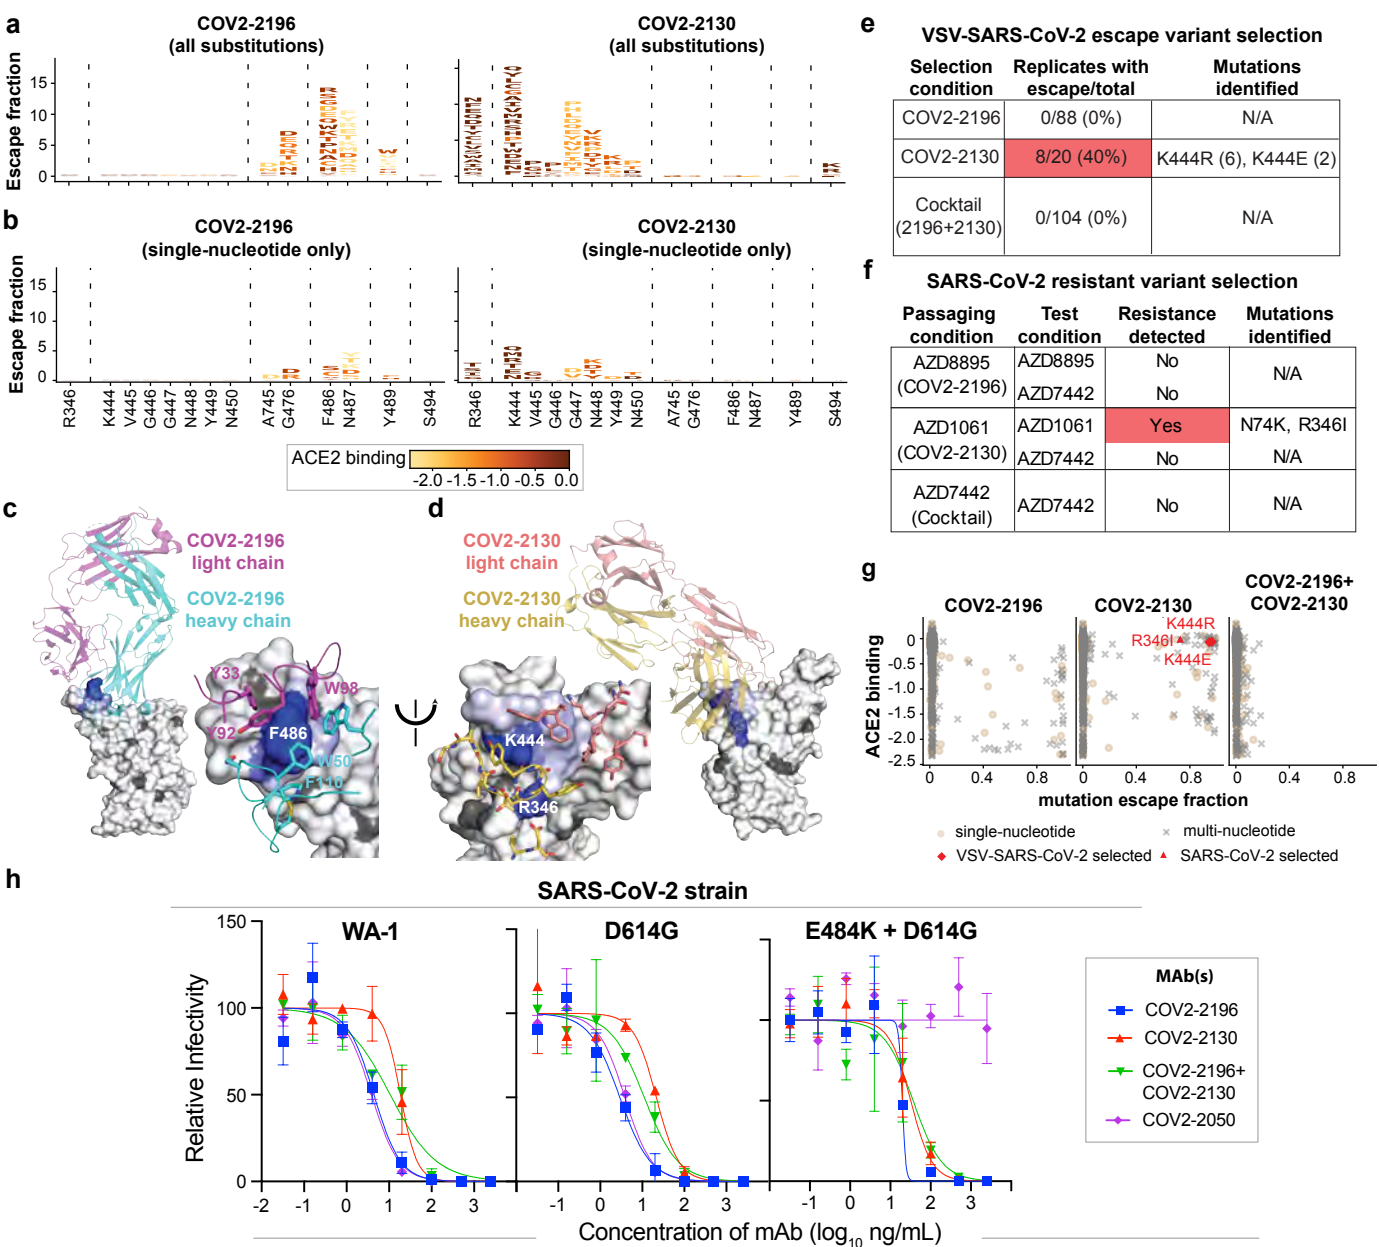

Source: https://www.biorxiv.org/content/biorxiv/early/2021/01/28/2021.01.27.428529.full.pdf
